# Supplementary material
Source: Research Square preprint supplement (doi:10.21203/rs.3.rs-8943220/v1)
Supplement: Supplementary file 1 [file 45004e71bb7aaf3fb1983e89.xlsx]

## Sheet: Acute CVD mortality
Table S6 Subgroup analyses of the association between dietary patterns and acute cardiovascular disease mortality risk
Subgroup Variable	Subgroup Category	Subgroup Participant/Death	Dietary Pattery	Dietary Pattery Participant/Death	Model 1 a		Model 4 b		P for interaction
					HR(95%CI)	P value	HR(95%CI)	P value
Age	≤60	21789/45	Rice Pattern	4174/5	1.00(0.00-0.00)		1.00(0.00-0.00)		0.4336
			Balanced Pattern	6215/18	2.20(0.82-5.92)	0.12	1.67(0.61-4.61)	0.3197
			Meat, Eggs, and Fresh Vegetables Pattern	5041/6	0.92(0.28-3.00)	0.8846	0.89(0.27-2.98)	0.8527
			Pickle Pattern	6359/16	1.93(0.71-5.28)	0.1989	1.80(0.66-4.96)	0.2538
	>60	24450/158	Rice Pattern	4152/23	1.00(0.00-0.00)		1.00(0.00-0.00)
			Balanced Pattern	7581/71	1.21(0.75-1.94)	0.4315	1.09(0.68-1.76)	0.7239
			Meat, Eggs, and Fresh Vegetables Pattern	5859/21	0.58(0.32-1.05)	0.0705	0.64(0.35-1.17)	0.1469
			Pickle Pattern	6858/43	1.03(0.62-1.71)	0.9147	1.02(0.61-1.69)	0.9428
Sex	Male	18815/124	Rice Pattern	3450/19	1.00(0.00-0.00)		1.00(0.00-0.00)		0.6839
			Balanced Pattern	5613/54	1.43(0.85-2.41)	0.1843	1.09(0.64-1.85)	0.7549
			Meat, Eggs, and Fresh Vegetables Pattern	4312/17	0.68(0.35-1.31)	0.2447	0.67(0.34-1.30)	0.2353
			Pickle Pattern	5440/34	1.06(0.60-1.85)	0.8509	0.96(0.55-1.69)	0.893
	Female	27424/79	Rice Pattern	4876/9	1.00(0.00-0.00)		1.00(0.00-0.00)
			Balanced Pattern	8183/35	1.84(0.88-3.83)	0.1039	1.44(0.68-3.05)	0.3463
			Meat, Eggs, and Fresh Vegetables Pattern	6588/10	0.74(0.30-1.82)	0.5125	0.73(0.30-1.82)	0.5026
			Pickle Pattern	7777/25	1.60(0.75-3.44)	0.2252	1.55(0.72-3.32)	0.2652
Urbanity	Rural	34517/179	Rice Pattern	5955/25	1.00(0.00-0.00)		1.00(0.00-0.00)		0.3301
			Balanced Pattern	12298/85	1.11(0.71-1.74)	0.6406	1.05(0.67-1.65)	0.8246
			Meat, Eggs, and Fresh Vegetables Pattern	6747/23	0.52(0.29-0.92)	0.0251	0.59(0.33-1.06)	0.0751
			Pickle Pattern	9517/46	0.91(0.56-1.48)	0.6968	0.93(0.57-1.51)	0.7599
	Urban	11722/24	Rice Pattern	2371/3	1.00(0.00-0.00)		1.00(0.00-0.00)
			Balanced Pattern	1498/4	2.44(0.54-10.95)	0.2439	2.19(0.48-9.99)	0.3108
			Meat, Eggs, and Fresh Vegetables Pattern	4153/4	1.24(0.28-5.56)	0.7791	1.20(0.27-5.40)	0.813
			Pickle Pattern	3700/13	3.22(0.92-11.35)	0.0685	2.95(0.83-10.46)	0.0939
Annual household income	≦50000	35959/177	Rice Pattern	6547/26	1.00(0.00-0.00)		1.00(0.00-0.00)		0.2765
			Balanced Pattern	11642/82	1.36(0.87-2.11)	0.1734	1.13(0.72-1.77)	0.5933
			Meat, Eggs, and Fresh Vegetables Pattern	8215/22	0.58(0.33-1.03)	0.0623	0.62(0.35-1.10)	0.1032
			Pickle Pattern	9555/47	1.06(0.66-1.71)	0.8197	1.02(0.63-1.64)	0.9525
	>50000	10280/26	Rice Pattern	1779/2	1.00(0.00-0.00)		1.00(0.00-0.00)
			Balanced Pattern	2154/7	2.85(0.59-13.88)	0.195	1.85(0.37-9.33)	0.4539
			Meat, Eggs, and Fresh Vegetables Pattern	2685/5	1.90(0.37-9.78)	0.4448	1.59(0.29-8.59)	0.5934
			Pickle Pattern	3662/12	3.56(0.79-16.02)	0.0982	2.84(0.62-13.02)	0.1786
Education level	Below high school	39468/184	Rice Pattern	6779/25	1.00(0.00-0.00)		1.00(0.00-0.00)		0.6028
			Balanced Pattern	12564/86	1.41(0.90-2.21)	0.1293	1.21(0.77-1.90)	0.4154
			Meat, Eggs, and Fresh Vegetables Pattern	9143/23	0.61(0.35-1.08)	0.0905	0.66(0.37-1.18)	0.1598
			Pickle Pattern	10982/50	1.12(0.69-1.81)	0.6468	1.10(0.68-1.78)	0.6948
	High school or above	6771/19	Rice Pattern	1547/3	1.00(0.00-0.00)		1.00(0.00-0.00)
			Balanced Pattern	1232/3	1.34(0.27-6.70)	0.7216	0.79(0.15-4.13)	0.7836
			Meat, Eggs, and Fresh Vegetables Pattern	1757/4	1.21(0.27-5.41)	0.8039	0.88(0.19-4.14)	0.8699
			Pickle Pattern	2235/9	2.12(0.57-7.86)	0.2598	1.53(0.40-5.78)	0.5334
Smoking status	No	35530/131	Rice Pattern	6320/20	1.00(0.00-0.00)		1.00(0.00-0.00)		0.5059
			Balanced Pattern	10381/48	1.17(0.69-1.97)	0.5581	0.92(0.54-1.57)	0.7528
			Meat, Eggs, and Fresh Vegetables Pattern	8510/18	0.61(0.32-1.16)	0.1304	0.63(0.33-1.19)	0.1545
			Pickle Pattern	10319/45	1.28(0.76-2.17)	0.3598	1.22(0.72-2.06)	0.4686
	Yes	10709/72	Rice Pattern	2006/8	1.00(0.00-0.00)		1.00(0.00-0.00)
			Balanced Pattern	3415/41	2.40(1.12-5.11)	0.0239	1.82(0.84-3.92)	0.128
			Meat, Eggs, and Fresh Vegetables Pattern	2390/9	0.87(0.34-2.27)	0.7804	0.84(0.32-2.19)	0.7137
			Pickle Pattern	2898/14	1.09(0.46-2.60)	0.8468	0.96(0.40-2.30)	0.9237
Alcohol consumption	No	41592/175	Rice Pattern	7478/25	1.00(0.00-0.00)		1.00(0.00-0.00)		0.5948
			Balanced Pattern	12195/71	1.38(0.88-2.18)	0.1647	1.10(0.69-1.75)	0.6894
			Meat, Eggs, and Fresh Vegetables Pattern	10007/24	0.66(0.37-1.15)	0.14	0.68(0.39-1.20)	0.1862
			Pickle Pattern	11912/55	1.26(0.78-2.02)	0.3428	1.19(0.74-1.92)	0.464
	Yes	4647/28	Rice Pattern	848/3	1.00(0.00-0.00)		1.00(0.00-0.00)
			Balanced Pattern	1601/18	2.76(0.81-9.38)	0.1036	1.84(0.53-6.37)	0.3391
			Meat, Eggs, and Fresh Vegetables Pattern	893/3	0.91(0.18-4.53)	0.9121	0.71(0.14-3.65)	0.6846
			Pickle Pattern	1305/4	0.92(0.21-4.10)	0.9089	0.76(0.17-3.42)	0.7204
Hypertension	No	10387/18	Rice Pattern	1983/5	1.00(0.00-0.00)		1.00(0.00-0.00)		0.2509
			Balanced Pattern	2754/6	0.85(0.26-2.79)	0.7867	0.51(0.15-1.80)	0.2981
			Meat, Eggs, and Fresh Vegetables Pattern	2541/2	0.31(0.06-1.61)	0.1645	0.27(0.05-1.43)	0.1235
			Pickle Pattern	3109/5	0.68(0.20-2.36)	0.5445	0.53(0.15-1.88)	0.3261
	Yes	35852/185	Rice Pattern	6343/23	1.00(0.00-0.00)		1.00(0.00-0.00)
			Balanced Pattern	11042/83	1.58(1.00-2.51)	0.0528	1.34(0.84-2.15)	0.2202
			Meat, Eggs, and Fresh Vegetables Pattern	8359/25	0.74(0.42-1.30)	0.2923	0.78(0.44-1.38)	0.3873
			Pickle Pattern	10108/54	1.30(0.80-2.12)	0.2924	1.28(0.79-2.09)	0.3188
Dyslipidemia	No	32353/141	Rice Pattern	5451/18	1.00(0.00-0.00)		1.00(0.00-0.00)		0.7162
			Balanced Pattern	10030/67	1.61(0.96-2.71)	0.0733	1.27(0.75-2.15)	0.3793
			Meat, Eggs, and Fresh Vegetables Pattern	7574/19	0.64(0.34-1.22)	0.1767	0.66(0.34-1.27)	0.2118
			Pickle Pattern	9298/37	1.11(0.63-1.96)	0.7091	1.08(0.62-1.90)	0.7833
	Yes	13886/62	Rice Pattern	2875/10	1.00(0.00-0.00)		1.00(0.00-0.00)
			Balanced Pattern	3766/22	1.33(0.63-2.82)	0.4562	0.99(0.46-2.14)	0.9807
			Meat, Eggs, and Fresh Vegetables Pattern	3326/8	0.74(0.29-1.88)	0.5265	0.74(0.29-1.90)	0.5335
			Pickle Pattern	3919/22	1.48(0.70-3.12)	0.3078	1.29(0.61-2.74)	0.5074
Diabetes	No	36158/143	Rice Pattern	6468/21	1.00(0.00-0.00)		1.00(0.00-0.00)		0.4925
			Balanced Pattern	10846/68	1.58(0.97-2.57)	0.0684	1.23(0.74-2.02)	0.4264
			Meat, Eggs, and Fresh Vegetables Pattern	8369/18	0.60(0.32-1.13)	0.1136	0.60(0.32-1.14)	0.1196
			Pickle Pattern	10475/36	0.98(0.57-1.68)	0.9341	0.91(0.53-1.57)	0.7457
	Yes	10070/60	Rice Pattern	1857/7	1.00(0.00-0.00)		1.00(0.00-0.00)
			Balanced Pattern	2940/21	1.43(0.61-3.38)	0.4097	1.07(0.44-2.57)	0.8887
			Meat, Eggs, and Fresh Vegetables Pattern	2531/9	0.90(0.34-2.42)	0.8358	0.93(0.34-2.53)	0.8874
			Pickle Pattern	2742/23	2.06(0.89-4.81)	0.0934	1.87(0.80-4.36)	0.1498
Physical activity c	Low	23050/119	Rice Pattern	4595/17	1.00(0.00-0.00)		1.00(0.00-0.00)		0.7155
			Balanced Pattern	6080/47	1.68(0.96-2.92)	0.0686	1.19(0.68-2.10)	0.5445
			Meat, Eggs, and Fresh Vegetables Pattern	5803/18	0.78(0.40-1.51)	0.4567	0.77(0.39-1.50)	0.4348
			Pickle Pattern	6572/37	1.37(0.77-2.43)	0.2829	1.21(0.68-2.16)	0.5101
	High	23189/84	Rice Pattern	3731/11	1.00(0.00-0.00)		1.00(0.00-0.00)
			Balanced Pattern	7716/42	1.49(0.77-2.89)	0.2407	1.26(0.64-2.48)	0.5093
			Meat, Eggs, and Fresh Vegetables Pattern	5097/9	0.55(0.23-1.32)	0.1799	0.58(0.24-1.42)	0.2314
			Pickle Pattern	6645/22	1.07(0.52-2.21)	0.853	1.05(0.51-2.18)	0.8866
Waist circumference d	Normal	21490/112	Rice Pattern	3898/15	1.00(0.00-0.00)		1.00(0.00-0.00)		0.8727
			Balanced Pattern	6517/49	1.59(0.89-2.83)	0.1171	1.15(0.64-2.08)	0.6409
			Meat, Eggs, and Fresh Vegetables Pattern	4870/17	0.85(0.43-1.71)	0.6497	0.82(0.41-1.66)	0.5798
			Pickle Pattern	6205/31	1.21(0.65-2.24)	0.5487	1.10(0.59-2.04)	0.7633
	High	24728/91	Rice Pattern	4426/13	1.00(0.00-0.00)		1.00(0.00-0.00)
			Balanced Pattern	7267/40	1.50(0.80-2.80)	0.207	1.23(0.65-2.35)	0.5235
			Meat, Eggs, and Fresh Vegetables Pattern	6027/10	0.51(0.22-1.17)	0.1118	0.55(0.24-1.27)	0.1596
			Pickle Pattern	7008/28	1.26(0.65-2.43)	0.4976	1.23(0.63-2.37)	0.5443
BMI	<28	38630/689	Rice Pattern	6980/24	1.00(0.00-0.00)		1.00(0.00-0.00)		0.7041
			Balanced Pattern	11331/71	1.45(0.91-2.30)	0.1188	1.11(0.70-1.79)	0.6534
			Meat, Eggs, and Fresh Vegetables Pattern	9198/22	0.65(0.37-1.16)	0.147	0.66(0.37-1.18)	0.1588
			Pickle Pattern	11121/49	1.19(0.73-1.93)	0.4939	1.12(0.68-1.82)	0.6615
	≥28	7609/37	Rice Pattern	1346/4	1.00(0.00-0.00)		1.00(0.00-0.00)
			Balanced Pattern	2465/18	2.02(0.68-5.99)	0.203	1.65(0.54-5.04)	0.3762
			Meat, Eggs, and Fresh Vegetables Pattern	1702/5	0.81(0.22-3.04)	0.7591	0.83(0.22-3.17)	0.7828
			Pickle Pattern	2096/10	1.42(0.45-4.53)	0.5523	1.36(0.42-4.35)	0.6063
aModel 1: No adjustments made.
bModel 4: Adjusted for age, sex, urbanity, ethnicity, annual household income, education level, smoking status, and alcohol consumption, BMI, hypertension, dyslipidemia, and diabetes.
cPhysical activity: Physical activity was assessed by multiplying the metabolic equivalent (MET) value by weekly activity duration (hours/week). The total physical activity level was divided into two groups by the median: <127 MET·h/week (low) and ≥127 MET·h/week (high).
dWaist circumference: Normal waist circumference: <90 cm for men and <80 cm for women; High waist circumference: ≥90 cm for men or ≥80 cm for women (WHO, 2000).
"-" : HR and 95%CI could not be stably estimated by Cox regression due to zero events in either the reference group or the respective dietary pattern.
