# Supplementary material
Source: Research Square preprint supplement (doi:10.21203/rs.3.rs-8943220/v1)
Supplement: Supplementary file 1 [file b4d99ec6f28adf26eef43a43.docx]

**Supplementary Materials**

**Contents**

**Table S1 Definition of high cardiovascular risk in the study population.**

**Table S2 ICD-10 codes and disease categories used for cause-of-death classification.**

**Table S3 Restricted mean survival time (RMST) for all-cause mortality across four dietary patterns and comparisons with the reference group (rice pattern).**

**Table S4 Survival probabilities and related indicators for all-cause mortality at key follow-up time points across four dietary patterns.**

**Table S5 Subgroup analyses of the association between dietary patterns and all-cause mortality risk.**

**Table S6 Subgroup analyses of the association between dietary patterns and acute cardiovascular disease mortality risk.**

**Table S7 Subgroup analyses of the association between dietary patterns and chronic cardiovascular disease mortality risk.**

**Table S8 Subgroup analyses of the association between dietary patterns and non-cardiovascular disease mortality risk.**

**Table S9 Sensitivity analyses of the association between dietary patterns and all-cause mortality risk.**

**Table S10 Sensitivity analyses of the association between dietary patterns and acute cardiovascular disease mortality risk.**

**Table S11 Sensitivity analyses of the association between dietary patterns and chronic cardiovascular disease mortality risk.**

**Table S1 Definition of high cardiovascular risk in the study population**

| **Category** | **Criteria** |
| --- | --- |
| Medical history | Documented history of myocardial infarction; previous percutaneous coronary intervention (PCI) or coronary artery bypass grafting (CABG); or history of stroke (ischemic or hemorrhagic). |
| Blood pressure and lipid levels | Systolic blood pressure (SBP) ≥160 mmHg or diastolic blood pressure (DBP) ≥100 mmHg; low-density lipoprotein cholesterol (LDL-C) ≥160 mg/dL (4.14 mmol/L); or high-density lipoprotein cholesterol (HDL-C) <30 mg/dL (0.78 mmol/L). |
| Predicted CVD risk | Ten-year CVD risk ≥20% estimated using the WHO 2008 CVD Risk Prediction Charts. |
| Family or special conditions | Participants with a family history of CVD, previous cardiovascular treatment among first-degree relatives, or evidence of rare familial cardiovascular syndromes. |

Individuals fulfilling any one of the above criteria are classified as high-risk subjects.

**Table S2 ICD-10 codes and disease categories used for cause-of-death classification**

| **Disease Category** | **ICD-10 codes included** | **Causes of death included** |
| --- | --- | --- |
| Acute cardiovascular mortality (Acute CVD mortality) | I21–I22, I46, I49.0, I60–I63 | Myocardial infarction, sudden cardiac death, hemorrhagic stroke, ischemic stroke |
| Chronic cardiovascular mortality (Chronic CVD mortality) | I20, I50, I30–I52, I70–I79 | Angina pectoris, heart failure, other chronic heart diseases, other vascular diseases |
| Non-cardiovascular mortality (Non-CVD mortality) | Non–I00–I99 | Other non-cardiovascular causes |

**Table S3 Restricted mean survival time (RMST) for all-cause mortality across four dietary patterns and comparisons with the reference group (rice pattern)**

| **Dietary Pattern** | **RMST(95%CI)**  **(Months)** | **RMST (Years)** | **Difference vs. Rice Pattern (95%CI) (Months)** | **Bonferroni-Corrected P Value** |
| --- | --- | --- | --- | --- |
| Balanced Pattern | 44.78(44.77-44.79) | 3.73 | 0.05(0.03-0.07) | 3.815×10⁻⁶ |
| Meat, Eggs, and Fresh Vegetables Pattern | 44.76(44.75-44.77) | 3.73 | 0.03(0.01-0.05) | 0.0018 |
| Pickle Pattern | 44.82(44.82-44.83) | 3.74 | 0.10(0.07-0.12) | 0.0076 |
| Rice Pattern | 44.73(44.71-44.74) | 3.73 | 0.00(-0.03-0.03) | Reference |

*Abbreviations*: Log-rank test for group differences: P < 0.001; RMST was calculated within a 45-month follow-up window (consistent with the median follow-up time of the study population).

**Table S4 Survival probabilities and related indicators for all-cause mortality at key follow-up time points across four dietary patterns**

| **Dietary Pattern** | **Follow-Up Time (Months)** | **Survival Probability(95%CI)** | **Number at Risk** | **Cumulative Deaths** | **Cumulative Censored** |
| --- | --- | --- | --- | --- | --- |
| Balanced Pattern | 12 | 99.85% (99.79-99.92%) | 13362 | 20 | 621 |
| 24 | 99.64% (99.54-99.74%) | 11707 | 27 | 1525 |
| 36 | 99.16% (98.99-99.32%) | 9801 | 54 | 1902 |
| 48 | 98.36% (98.1-98.61%) | 6951 | 67 | 2979 |
| 60 | 97.05% (96.65-97.45%) | 4194 | 66 | 2447 |
| 72 | 95.17% (94.51-95.84%) | 752 | 54 | 3303 |
| Meat, Eggs, and Fresh Vegetables Pattern | 12 | 99.85% (99.78-99.93%) | 9381 | 15 | 2136 |
| 24 | 99.6% (99.46-99.73%) | 7090 | 20 | 1702 |
| 36 | 99.35% (99.17-99.53%) | 6029 | 17 | 1048 |
| 48 | 98.81% (98.54-99.08%) | 4456 | 28 | 1641 |
| 60 | 98.07% (97.68-98.47%) | 2834 | 24 | 1542 |
| 72 | 97.52% (97-98.05%) | 749 | 12 | 1983 |
| Pickle Pattern | 12 | 99.82% (99.75-99.89%) | 12115 | 23 | 1608 |
| 24 | 99.55% (99.43-99.67%) | 10031 | 29 | 1615 |
| 36 | 99.03% (98.84-99.22%) | 8333 | 49 | 1658 |
| 48 | 97.86% (97.53-98.18%) | 5129 | 75 | 3314 |
| 60 | 97.11% (96.69-97.53%) | 3124 | 30 | 1770 |
| 72 | 95.89% (95.19-96.59%) | 847 | 20 | 2185 |
| Rice Pattern | 12 | 99.92% (99.86-99.98%) | 6578 | 6 | 1824 |
| 24 | 99.59% (99.44-99.75%) | 5880 | 20 | 658 |
| 36 | 98.58% (98.27-98.9%) | 4735 | 53 | 1130 |
| 48 | 97.66% (97.22-98.1%) | 3084 | 35 | 1695 |
| 60 | 97.22% (96.72-97.73%) | 1872 | 11 | 1050 |
| 72 | 96.79% (96.15-97.43%) | 375 | 5 | 1467 |

**Table S5 Subgroup analyses of the association between dietary patterns and all-cause mortality risk**

Detailed results are not shown here due to the large table size. Full results are provided in the accompanying Excel file " Supplementary_Table_S5.xlsx".

**Table S6 Subgroup analyses of the association between dietary patterns and acute cardiovascular disease mortality risk**

Detailed results are not shown here due to the large table size. Full results are provided in the accompanying Excel file " Supplementary_Table_S6.xlsx".

**Table S7 Subgroup analyses of the association between dietary patterns and chronic cardiovascular disease mortality risk**

Detailed results are not shown here due to the large table size. Full results are provided in the accompanying Excel file " Supplementary_Table_S7.xlsx".

**Table S8 Subgroup analyses of the association between dietary patterns and non-cardiovascular disease mortality risk**

Detailed results are not shown here due to the large table size. Full results are provided in the accompanying Excel file " Supplementary_Table_S8.xlsx".

**Table S9 Sensitivity analyses of the association between dietary patterns and all-cause mortality risk**

Detailed results are not shown here due to the large table size. Full results are provided in the accompanying Excel file " Supplementary_Table_S9.xlsx".

**Table S10 Sensitivity analyses of the association between dietary patterns and acute cardiovascular disease mortality risk**

Detailed results are not shown here due to the large table size. Full results are provided in the accompanying Excel file " Supplementary_Table_S10.xlsx".

**Table S11 Sensitivity analyses of the association between dietary patterns and chronic cardiovascular disease mortality risk**

Detailed results are not shown here due to the large table size. Full results are provided in the accompanying Excel file " Supplementary_Table_S11.xlsx".

**Table S12 Sensitivity analyses of the association between dietary patterns and non-cardiovascular disease mortality risk**

Detailed results are not shown here due to the large table size. Full results are provided in the accompanying Excel file " Supplementary_Table_S12.xlsx".
