# Supplementary material
Source: Research Square preprint supplement (doi:10.21203/rs.3.rs-8943220/v1)
Supplement: Supplementary file 2 [file 4547dcbe906c97d889031331.xlsx]

## Sheet: All-cause mortality
Table S5 Subgroup analyses of the association between dietary patterns and all-cause mortality risk
Subgroup Variable	Subgroup Category	Subgroup Participant/Death	Dietary Pattery	Dietary Pattery Participant/Death	Model 1 a		Model 4 b		P for interaction
					HR(95%CI)	P value	HR(95%CI)	P value
Age	≤60	21789/166	Rice Pattern	4174/24	1.00(0.00-0.00)		1.00(0.00-0.00)		0.0835
			Balanced Pattern	6215/65	1.60(1.00-2.56)	0.0483	1.24(0.77-2.00)	0.3682
			Meat, Eggs, and Fresh Vegetables Pattern	5041/22	0.73(0.41-1.31)	0.2909	0.77(0.43-1.39)	0.3881
			Pickle Pattern	6359/55	1.42(0.88-2.29)	0.1562	1.34(0.83-2.16)	0.2365
	>60	24450/626	Rice Pattern	4152/111	1.00(0.00-0.00)		1.00(0.00-0.00)
			Balanced Pattern	7581/239	0.84(0.67-1.06)	0.1378	0.76(0.60-0.95)	0.0176
			Meat, Eggs, and Fresh Vegetables Pattern	5859/102	0.59(0.45-0.77)	0.0001	0.61(0.47-0.81)	0.0005
			Pickle Pattern	6858/174	0.86(0.67-1.09)	0.1971	0.83(0.65-1.05)	0.1211
Sex	Male	18815/485	Rice Pattern	3450/94	1.00(0.00-0.00)		1.00(0.00-0.00)		0.0672
			Balanced Pattern	5613/178	0.94(0.74-1.21)	0.6515	0.72(0.56-0.93)	0.0116
			Meat, Eggs, and Fresh Vegetables Pattern	4312/77	0.63(0.47-0.85)	0.0028	0.61(0.45-0.82)	0.0014
			Pickle Pattern	5440/136	0.85(0.66-1.11)	0.2316	0.78(0.60-1.01)	0.0638
	Female	27424/307	Rice Pattern	4876/41	1.00(0.00-0.00)		1.00(0.00-0.00)
			Balanced Pattern	8183/126	1.43(1.00-2.03)	0.0487	1.09(0.76-1.56)	0.6497
			Meat, Eggs, and Fresh Vegetables Pattern	6588/47	0.78(0.51-1.18)	0.2353	0.74(0.48-1.14)	0.1673
			Pickle Pattern	7777/93	1.30(0.90-1.88)	0.1593	1.25(0.86-1.80)	0.2451
Urbanity	Rural	34517/702	Rice Pattern	5955/120	1.00(0.00-0.00)		1.00(0.00-0.00)		0.0327
			Balanced Pattern	12298/288	0.80(0.64-0.98)	0.0352	0.75(0.61-0.93)	0.0087
			Meat, Eggs, and Fresh Vegetables Pattern	6747/110	0.54(0.42-0.70)	0	0.60(0.46-0.78)	0.0002
			Pickle Pattern	9517/184	0.77(0.61-0.97)	0.0285	0.78(0.62-0.98)	0.0353
	Urban	11722/90	Rice Pattern	2371/15	1.00(0.00-0.00)		1.00(0.00-0.00)
			Balanced Pattern	1498/16	1.84(0.91-3.74)	0.0902	1.49(0.72-3.05)	0.2806
			Meat, Eggs, and Fresh Vegetables Pattern	4153/14	0.91(0.44-1.89)	0.7977	0.82(0.39-1.73)	0.6085
			Pickle Pattern	3700/45	2.10(1.17-3.78)	0.0131	1.80(1.00-3.25)	0.0518
Annual household income	≦50000	35959/679	Rice Pattern	6547/116	1.00(0.00-0.00)		1.00(0.00-0.00)		0.8084
			Balanced Pattern	11642/274	1.02(0.82-1.27)	0.8517	0.84(0.67-1.05)	0.1226
			Meat, Eggs, and Fresh Vegetables Pattern	8215/99	0.60(0.46-0.78)	0.0002	0.62(0.47-0.82)	0.0006
			Pickle Pattern	9555/190	0.96(0.77-1.21)	0.754	0.92(0.73-1.16)	0.4966
	>50000	10280/113	Rice Pattern	1779/19	1.00(0.00-0.00)		1.00(0.00-0.00)
			Balanced Pattern	2154/30	1.15(0.65-2.06)	0.6268	0.79(0.43-1.43)	0.4339
			Meat, Eggs, and Fresh Vegetables Pattern	2685/25	0.97(0.54-1.77)	0.9289	0.73(0.39-1.35)	0.313
			Pickle Pattern	3662/39	1.13(0.65-1.96)	0.6644	0.86(0.49-1.51)	0.6098
Education level	Below high school	39468/735	Rice Pattern	6779/121	1.00(0.00-0.00)		1.00(0.00-0.00)		0.7604
			Balanced Pattern	12564/295	1.00(0.81-1.24)	0.9782	0.86(0.69-1.07)	0.1653
			Meat, Eggs, and Fresh Vegetables Pattern	9143/111	0.62(0.48-0.80)	0.0002	0.64(0.49-0.83)	0.0009
			Pickle Pattern	10982/208	0.96(0.77-1.20)	0.7312	0.93(0.74-1.17)	0.5381
	High school or above	6771/57	Rice Pattern	1547/14	1.00(0.00-0.00)		1.00(0.00-0.00)
			Balanced Pattern	1232/9	0.78(0.33-1.80)	0.5516	0.49(0.21-1.17)	0.1087
			Meat, Eggs, and Fresh Vegetables Pattern	1757/13	0.88(0.41-1.87)	0.7333	0.68(0.31-1.48)	0.335
			Pickle Pattern	2235/21	1.02(0.52-2.02)	0.9441	0.79(0.40-1.58)	0.5099
Smoking status	No	35530/513	Rice Pattern	6320/82	1.00(0.00-0.00)		1.00(0.00-0.00)		0.6637
			Balanced Pattern	10381/191	1.13(0.87-1.46)	0.3641	0.87(0.67-1.14)	0.3075
			Meat, Eggs, and Fresh Vegetables Pattern	8510/79	0.67(0.49-0.91)	0.0102	0.65(0.48-0.89)	0.0078
			Pickle Pattern	10319/161	1.11(0.85-1.45)	0.4349	1.05(0.81-1.37)	0.7156
	Yes	10709/279	Rice Pattern	2006/53	1.00(0.00-0.00)		1.00(0.00-0.00)
			Balanced Pattern	3415/113	0.99(0.72-1.38)	0.9659	0.77(0.56-1.08)	0.1303
			Meat, Eggs, and Fresh Vegetables Pattern	2390/45	0.67(0.45-1.00)	0.0477	0.63(0.42-0.95)	0.0262
			Pickle Pattern	2898/68	0.81(0.57-1.16)	0.2516	0.71(0.49-1.02)	0.062
Alcohol consumption	No	41592/692	Rice Pattern	7478/121	1.00(0.00-0.00)		1.00(0.00-0.00)		0.4419
			Balanced Pattern	12195/261	1.05(0.84-1.30)	0.6925	0.83(0.66-1.03)	0.0872
			Meat, Eggs, and Fresh Vegetables Pattern	10007/109	0.63(0.48-0.81)	0.0004	0.62(0.48-0.81)	0.0004
			Pickle Pattern	11912/201	0.95(0.76-1.19)	0.672	0.90(0.71-1.12)	0.342
	Yes	4647/100	Rice Pattern	848/14	1.00(0.00-0.00)		1.00(0.00-0.00)
			Balanced Pattern	1601/43	1.39(0.76-2.54)	0.2883	0.92(0.50-1.70)	0.7959
			Meat, Eggs, and Fresh Vegetables Pattern	893/15	0.98(0.47-2.04)	0.9626	0.83(0.39-1.73)	0.6118
			Pickle Pattern	1305/28	1.33(0.70-2.52)	0.3864	1.11(0.58-2.11)	0.7619
Hypertension	No	10387/88	Rice Pattern	1983/22	1.00(0.00-0.00)		1.00(0.00-0.00)		0.0912
			Balanced Pattern	2754/32	0.99(0.57-1.70)	0.9647	0.54(0.31-0.96)	0.034
			Meat, Eggs, and Fresh Vegetables Pattern	2541/11	0.40(0.19-0.82)	0.0121	0.25(0.11-0.56)	0.0006
			Pickle Pattern	3109/23	0.71(0.39-1.27)	0.2428	0.49(0.27-0.88)	0.0175
	Yes	35852/704	Rice Pattern	6343/113	1.00(0.00-0.00)		1.00(0.00-0.00)
			Balanced Pattern	11042/272	1.05(0.84-1.31)	0.664	0.89(0.71-1.11)	0.291
			Meat, Eggs, and Fresh Vegetables Pattern	8359/113	0.69(0.53-0.90)	0.0056	0.72(0.55-0.94)	0.0145
			Pickle Pattern	10108/206	1.01(0.80-1.27)	0.9422	0.99(0.79-1.25)	0.9341
Dyslipidemia	No	32353/575	Rice Pattern	5451/89	1.00(0.00-0.00)		1.00(0.00-0.00)		0.3743
			Balanced Pattern	10030/231	1.13(0.88-1.44)	0.3322	0.90(0.70-1.15)	0.3809
			Meat, Eggs, and Fresh Vegetables Pattern	7574/90	0.63(0.47-0.85)	0.0022	0.63(0.47-0.85)	0.0024
			Pickle Pattern	9298/165	1.01(0.78-1.31)	0.9425	0.97(0.75-1.26)	0.8338
	Yes	13886/217	Rice Pattern	2875/46	1.00(0.00-0.00)		1.00(0.00-0.00)
			Balanced Pattern	3766/73	0.94(0.65-1.35)	0.7222	0.71(0.48-1.03)	0.0716
			Meat, Eggs, and Fresh Vegetables Pattern	3326/34	0.70(0.45-1.09)	0.1094	0.71(0.45-1.11)	0.1322
			Pickle Pattern	3919/64	0.92(0.63-1.35)	0.6758	0.81(0.55-1.18)	0.2671
Diabetes	No	36158/541	Rice Pattern	6468/96	1.00(0.00-0.00)		1.00(0.00-0.00)		0.2859
			Balanced Pattern	10846/204	1.03(0.81-1.31)	0.8363	0.78(0.61-1.00)	0.0476
			Meat, Eggs, and Fresh Vegetables Pattern	8369/81	0.61(0.45-0.82)	0.0009	0.59(0.44-0.80)	0.0006
			Pickle Pattern	10475/160	0.95(0.74-1.23)	0.7137	0.88(0.68-1.13)	0.3039
	Yes	10070/251	Rice Pattern	1857/39	1.00(0.00-0.00)		1.00(0.00-0.00)
			Balanced Pattern	2940/100	1.22(0.84-1.77)	0.2881	0.97(0.67-1.42)	0.8879
			Meat, Eggs, and Fresh Vegetables Pattern	2531/43	0.78(0.50-1.20)	0.257	0.78(0.50-1.21)	0.258
			Pickle Pattern	2742/69	1.10(0.74-1.63)	0.6366	1.02(0.69-1.51)	0.9326
Physical activity c	Low	23050/440	Rice Pattern	4595/73	1.00(0.00-0.00)		1.00(0.00-0.00)		0.1962
			Balanced Pattern	6080/151	1.24(0.94-1.64)	0.1354	0.90(0.67-1.19)	0.4445
			Meat, Eggs, and Fresh Vegetables Pattern	5803/73	0.75(0.54-1.04)	0.0807	0.75(0.54-1.04)	0.0805
			Pickle Pattern	6572/143	1.23(0.93-1.63)	0.1547	1.07(0.81-1.43)	0.6252
	High	23189/352	Rice Pattern	3731/62	1.00(0.00-0.00)		1.00(0.00-0.00)
			Balanced Pattern	7716/153	0.97(0.72-1.30)	0.8344	0.79(0.58-1.07)	0.1241
			Meat, Eggs, and Fresh Vegetables Pattern	5097/51	0.56(0.39-0.81)	0.0022	0.55(0.37-0.80)	0.0019
			Pickle Pattern	6645/86	0.75(0.54-1.03)	0.0789	0.74(0.53-1.03)	0.0719
Waist circumference d	Normal	21490/462	Rice Pattern	3898/78	1.00(0.00-0.00)		1.00(0.00-0.00)		0.4658
			Balanced Pattern	6517/174	1.08(0.83-1.41)	0.5642	0.79(0.60-1.04)	0.091
			Meat, Eggs, and Fresh Vegetables Pattern	4870/82	0.80(0.59-1.09)	0.16	0.75(0.55-1.03)	0.072
			Pickle Pattern	6205/128	0.96(0.72-1.27)	0.7615	0.88(0.66-1.17)	0.3829
	High	24728/330	Rice Pattern	4426/57	1.00(0.00-0.00)		1.00(0.00-0.00)
			Balanced Pattern	7267/130	1.09(0.80-1.49)	0.5883	0.89(0.64-1.22)	0.4566
			Meat, Eggs, and Fresh Vegetables Pattern	6027/42	0.50(0.34-0.74)	0.0006	0.52(0.35-0.78)	0.0014
			Pickle Pattern	7008/101	1.03(0.74-1.43)	0.8568	0.99(0.71-1.37)	0.9325
BMI	<28	38630/689	Rice Pattern	6980/118	1.00(0.00-0.00)		1.00(0.00-0.00)		0.6511
			Balanced Pattern	11331/258	1.07(0.86-1.33)	0.5601	0.82(0.66-1.03)	0.0871
			Meat, Eggs, and Fresh Vegetables Pattern	9198/111	0.68(0.52-0.88)	0.0032	0.67(0.52-0.88)	0.0032
			Pickle Pattern	11121/202	0.99(0.79-1.25)	0.9562	0.93(0.74-1.17)	0.5496
	≥28	7609/103	Rice Pattern	1346/17	1.00(0.00-0.00)		1.00(0.00-0.00)
			Balanced Pattern	2465/46	1.20(0.69-2.10)	0.5176	0.92(0.52-1.62)	0.7599
			Meat, Eggs, and Fresh Vegetables Pattern	1702/13	0.51(0.25-1.05)	0.0675	0.48(0.23-1.00)	0.0484
			Pickle Pattern	2096/27	0.91(0.50-1.67)	0.7654	0.82(0.44-1.51)	0.5221
aModel 1: No adjustments made.
bModel 4: Adjusted for age, sex, urbanity, ethnicity, annual household income, education level, smoking status, and alcohol consumption, BMI, hypertension, dyslipidemia, and diabetes.
cPhysical activity: Physical activity was assessed by multiplying the metabolic equivalent (MET) value by weekly activity duration (hours/week). The total physical activity level was divided into two groups by the median: <127 MET·h/week (low) and ≥127 MET·h/week (high).
dWaist circumference: Normal waist circumference: <90 cm for men and <80 cm for women; High waist circumference: ≥90 cm for men or ≥80 cm for women (WHO, 2000).
"-" : HR and 95%CI could not be stably estimated by Cox regression due to zero events in either the reference group or the respective dietary pattern.
