# Supplementary material
Source: Research Square preprint supplement (doi:10.21203/rs.3.rs-8943220/v1)
Supplement: Supplementary file 3 [file 5b88528b4806266346c4b5cc.xlsx]

## Sheet: Sheet1
Table S9 Sensitivity analyses of the association between dietary patterns and all-cause mortality risk
Variable	Category	Participant/Death	Dietary Pattery	Dietary Pattery Participant/Death	Model 1 a		Model 4 b		P for interaction
					HR(95%CI)	P value	HR(95%CI)	P value
Age	≤60	19945/155	Rice Pattern	3547/24	1.00(0.00-0.00)		1.00(0.00-0.00)		0.1202
			Balanced Pattern	5993/60	1.47(0.92-2.37)	0.1086	1.11(0.68-1.78)	0.684
			Meat, Eggs, and Fresh Vegetables Pattern	4500/20	0.67(0.37-1.21)	0.1803	0.69(0.38-1.26)	0.2315
			Pickle Pattern	5905/51	1.31(0.81-2.13)	0.2728	1.21(0.75-1.98)	0.4367
	>60	21491/589	Rice Pattern	3031/106	1.00(0.00-0.00)		1.00(0.00-0.00)
			Balanced Pattern	7369/230	0.84(0.67-1.06)	0.1339	0.75(0.59-0.95)	0.0152
			Meat, Eggs, and Fresh Vegetables Pattern	4881/93	0.56(0.42-0.74)	0	0.58(0.44-0.77)	0.0002
			Pickle Pattern	6210/160	0.82(0.64-1.05)	0.1202	0.80(0.62-1.02)	0.0689
Sex	Male	16678/452	Rice Pattern	2689/89	1.00(0.00-0.00)		1.00(0.00-0.00)		0.1229
			Balanced Pattern	5432/170	0.94(0.73-1.22)	0.6603	0.71(0.54-0.92)	0.009
			Meat, Eggs, and Fresh Vegetables Pattern	3613/70	0.61(0.44-0.83)	0.0018	0.58(0.42-0.79)	0.0007
			Pickle Pattern	4944/123	0.81(0.62-1.07)	0.1384	0.74(0.56-0.97)	0.0291
	Female	24758/292	Rice Pattern	3889/41	1.00(0.00-0.00)		1.00(0.00-0.00)
			Balanced Pattern	7930/120	1.35(0.95-1.92)	0.0992	1.02(0.71-1.46)	0.933
			Meat, Eggs, and Fresh Vegetables Pattern	5768/43	0.71(0.46-1.09)	0.1159	0.67(0.43-1.04)	0.0717
			Pickle Pattern	7171/88	1.23(0.85-1.79)	0.2693	1.18(0.81-1.71)	0.3963
Urbanity	Rural	32075/665	Rice Pattern	4770/117	1.00(0.00-0.00)		1.00(0.00-0.00)		0.0309
			Balanced Pattern	11999/276	0.77(0.62-0.95)	0.0165	0.72(0.58-0.90)	0.0036
			Meat, Eggs, and Fresh Vegetables Pattern	6395/102	0.50(0.38-0.66)	0	0.56(0.43-0.73)	0
			Pickle Pattern	8911/170	0.73(0.57-0.92)	0.0076	0.73(0.58-0.93)	0.0104
	Urban	9361/79	Rice Pattern	1808/13	1.00(0.00-0.00)		1.00(0.00-0.00)
			Balanced Pattern	1363/14	1.91(0.90-4.09)	0.0931	1.58(0.73-3.41)	0.2464
			Meat, Eggs, and Fresh Vegetables Pattern	2986/11	0.90(0.4-2.01)	0.7977	0.86(0.38-1.94)	0.7143
			Pickle Pattern	3204/41	2.26(1.21-4.24)	0.0106	1.90(1.01-3.58)	0.0461
Annual household income	≦50000	32422/640	Rice Pattern	5147/112	1.00(0.00-0.00)		1.00(0.00-0.00)		0.8837
			Balanced Pattern	11262/261	1.00(0.80-1.24)	0.9743	0.81(0.65-1.01)	0.0635
			Meat, Eggs, and Fresh Vegetables Pattern	7204/91	0.57(0.43-0.75)	0.0001	0.58(0.44-0.77)	0.0002
			Pickle Pattern	8809/176	0.92(0.73-1.17)	0.491	0.88(0.69-1.11)	0.2776
	>50000	9014/104	Rice Pattern	1431/18	1.00(0.00-0.00)		1.00(0.00-0.00)
			Balanced Pattern	2100/29	1.18(0.65-2.13)	0.59	0.79(0.43-1.46)	0.4497
			Meat, Eggs, and Fresh Vegetables Pattern	2177/22	0.92(0.49-1.71)	0.7849	0.67(0.35-1.29)	0.2298
			Pickle Pattern	3306/35	1.09(0.62-1.93)	0.7675	0.84(0.47-1.49)	0.5442
Education level	Below high school	35681/691	Rice Pattern	5326/117	1.00(0.00-0.00)		1.00(0.00-0.00)		0.6242
			Balanced Pattern	12181/281	0.98(0.79-1.21)	0.8313	0.83(0.66-1.03)	0.088
			Meat, Eggs, and Fresh Vegetables Pattern	8018/100	0.57(0.44-0.75)	0	0.59(0.45-0.77)	0.0001
			Pickle Pattern	10156/193	0.92(0.73-1.16)	0.4853	0.89(0.71-1.12)	0.3192
	High school or above	5755/53	Rice Pattern	1252/13	1.00(0.00-0.00)		1.00(0.00-0.00)
			Balanced Pattern	1181/9	0.84(0.36-1.97)	0.6846	0.51(0.21-1.23)	0.134
			Meat, Eggs, and Fresh Vegetables Pattern	1363/13	0.95(0.44-2.06)	0.9023	0.71(0.32-1.58)	0.4067
			Pickle Pattern	1959/18	0.95(0.47-1.94)	0.8882	0.72(0.35-1.49)	0.3787
Smoking status	No	31818/479	Rice Pattern	5007/79	1.00(0.00-0.00)		1.00(0.00-0.00)		0.6643
			Balanced Pattern	10056/183	1.11(0.85-1.45)	0.4365	0.85(0.65-1.11)	0.2221
			Meat, Eggs, and Fresh Vegetables Pattern	7304/71	0.62(0.45-0.86)	0.0037	0.60(0.43-0.83)	0.0021
			Pickle Pattern	9451/146	1.05(0.80-1.38)	0.7453	0.99(0.75-1.30)	0.9234
	Yes	9618/265	Rice Pattern	1571/51	1.00(0.00-0.00)		1.00(0.00-0.00)
			Balanced Pattern	3306/107	0.97(0.70-1.35)	0.858	0.74(0.53-1.04)	0.0876
			Meat, Eggs, and Fresh Vegetables Pattern	2077/42	0.65(0.43-0.98)	0.0383	0.61(0.40-0.93)	0.0206
			Pickle Pattern	2664/65	0.81(0.56-1.16)	0.2459	0.69(0.48-1.00)	0.0505
Alcohol consumption	No	37243/652	Rice Pattern	5894/118	1.00(0.00-0.00)		1.00(0.00-0.00)		0.2655
			Balanced Pattern	11806/249	1.01(0.81-1.26)	0.9083	0.79(0.63-0.98)	0.0355
			Meat, Eggs, and Fresh Vegetables Pattern	8616/99	0.58(0.45-0.76)	0.0001	0.57(0.44-0.75)	0.0001
			Pickle Pattern	10927/186	0.90(0.72-1.14)	0.3869	0.85(0.67-1.07)	0.1542
	Yes	4193/92	Rice Pattern	684/12	1.00(0.00-0.00)		1.00(0.00-0.00)
			Balanced Pattern	1556/41	1.53(0.81-2.92)	0.1937	1.00(0.52-1.92)	0.9963
			Meat, Eggs, and Fresh Vegetables Pattern	765/14	1.07(0.50-2.32)	0.8601	0.91(0.42-2.00)	0.822
			Pickle Pattern	1188/25	1.39(0.70-2.78)	0.3443	1.15(0.57-2.29)	0.7011
Hypertension	No	9138/78	Rice Pattern	1631/21	1.00(0.00-0.00)		1.00(0.00-0.00)		0.0776
			Balanced Pattern	2614/27	0.87(0.49-1.54)	0.6375	0.47(0.26-0.85)	0.0129
			Meat, Eggs, and Fresh Vegetables Pattern	2155/10	0.38(0.18-0.81)	0.0116	0.23(0.10-0.53)	0.0005
			Pickle Pattern	2738/20	0.65(0.35-1.20)	0.1694	0.44(0.24-0.83)	0.0106
	Yes	32298/666	Rice Pattern	4947/109	1.00(0.00-0.00)		1.00(0.00-0.00)
			Balanced Pattern	10748/263	1.04(0.83-1.30)	0.7156	0.87(0.69-1.09)	0.2174
			Meat, Eggs, and Fresh Vegetables Pattern	7226/103	0.65(0.5-0.85)	0.0019	0.67(0.51-0.88)	0.0045
			Pickle Pattern	9377/191	0.97(0.77-1.22)	0.7832	0.95(0.75-1.20)	0.6471
Dyslipidemia	No	29285/541	Rice Pattern	4390/87	1.00(0.00-0.00)		1.00(0.00-0.00)		0.3773
			Balanced Pattern	9715/221	1.10(0.85-1.40)	0.4728	0.86(0.67-1.11)	0.2352
			Meat, Eggs, and Fresh Vegetables Pattern	6654/80	0.57(0.42-0.78)	0.0003	0.56(0.41-0.77)	0.0003
			Pickle Pattern	8526/153	0.96(0.74-1.25)	0.7453	0.92(0.71-1.20)	0.5325
	Yes	12151/203	Rice Pattern	2188/43	1.00(0.00-0.00)		1.00(0.00-0.00)
			Balanced Pattern	3647/69	0.94(0.64-1.37)	0.7309	0.68(0.46-1.01)	0.056
			Meat, Eggs, and Fresh Vegetables Pattern	2727/33	0.73(0.47-1.15)	0.1767	0.73(0.46-1.15)	0.1781
			Pickle Pattern	3589/58	0.89(0.60-1.33)	0.5756	0.77(0.52-1.14)	0.1926
Diabetes	No	32655/503	Rice Pattern	5168/91	1.00(0.00-0.00)		1.00(0.00-0.00)		0.3986
			Balanced Pattern	10509/194	1.02(0.79-1.31)	0.8812	0.76(0.59-0.98)	0.0346
			Meat, Eggs, and Fresh Vegetables Pattern	7324/72	0.57(0.42-0.77)	0.0003	0.55(0.40-0.75)	0.0002
			Pickle Pattern	9654/146	0.92(0.71-1.19)	0.5194	0.83(0.64-1.09)	0.176
	Yes	8770/241	Rice Pattern	1409/39	1.00(0.00-0.00)		1.00(0.00-0.00)
			Balanced Pattern	2843/96	1.17(0.8-1.69)	0.4168	0.92(0.62-1.34)	0.6482
			Meat, Eggs, and Fresh Vegetables Pattern	2057/41	0.74(0.48-1.15)	0.1857	0.73(0.47-1.14)	0.1699
			Pickle Pattern	2461/65	1.04(0.70-1.54)	0.8568	0.96(0.64-1.43)	0.8263
Physical activity c	Low	20061/410	Rice Pattern	3399/69	1.00(0.00-0.00)		1.00(0.00-0.00)		0.129
			Balanced Pattern	5830/142	1.22(0.91-1.62)	0.1799	0.87(0.65-1.17)	0.3546
			Meat, Eggs, and Fresh Vegetables Pattern	4815/67	0.73(0.52-1.02)	0.063	0.72(0.51-1.01)	0.0531
			Pickle Pattern	6017/132	1.20(0.89-1.60)	0.2308	1.04(0.78-1.40)	0.7871
	High	21375/334	Rice Pattern	3179/61	1.00(0.00-0.00)		1.00(0.00-0.00)
			Balanced Pattern	7532/148	0.95(0.70-1.28)	0.7195	0.75(0.55-1.01)	0.0617
			Meat, Eggs, and Fresh Vegetables Pattern	4566/46	0.51(0.35-0.75)	0.0007	0.49(0.33-0.72)	0.0004
			Pickle Pattern	6098/79	0.70(0.50-0.98)	0.0351	0.69(0.49-0.96)	0.027
Waist circumference d	Normal	19151/432	Rice Pattern	3035/74	1.00(0.00-0.00)		1.00(0.00-0.00)		0.5383
			Balanced Pattern	6298/165	1.07(0.82-1.41)	0.6153	0.76(0.58-1.01)	0.0587
			Meat, Eggs, and Fresh Vegetables Pattern	4160/76	0.78(0.57-1.08)	0.1342	0.72(0.52-1.00)	0.0495
			Pickle Pattern	5658/117	0.92(0.69-1.24)	0.5893	0.84(0.63-1.13)	0.246
	High	22264/312	Rice Pattern	3541/56	1.00(0.00-0.00)		1.00(0.00-0.00)
			Balanced Pattern	7052/125	1.06(0.77-1.45)	0.7283	0.86(0.62-1.18)	0.3424
			Meat, Eggs, and Fresh Vegetables Pattern	5218/37	0.45(0.30-0.68)	0.0001	0.46(0.30-0.70)	0.0003
			Pickle Pattern	6453/94	0.98(0.70-1.36)	0.8843	0.93(0.67-1.30)	0.6773
BMI	<28	34480/649	Rice Pattern	5491/114	1.00(0.00-0.00)		1.00(0.00-0.00)		0.5723
			Balanced Pattern	10952/246	1.04(0.84-1.30)	0.701	0.79(0.63-0.99)	0.0435
			Meat, Eggs, and Fresh Vegetables Pattern	7874/102	0.65(0.49-0.84)	0.0013	0.63(0.48-0.83)	0.001
			Pickle Pattern	10163/187	0.95(0.76-1.20)	0.6825	0.89(0.70-1.12)	0.3219
	≥28	6956/95	Rice Pattern	1087/16	1.00(0.00-0.00)		1.00(0.00-0.00)
			Balanced Pattern	2410/44	1.21(0.68-2.14)	0.5206	0.91(0.50-1.64)	0.7529
			Meat, Eggs, and Fresh Vegetables Pattern	1507/11	0.45(0.21-0.98)	0.043	0.42(0.19-0.92)	0.0296
			Pickle Pattern	1952/24	0.86(0.46-1.61)	0.6307	0.76(0.40-1.44)	0.3934
aModel 1: No adjustments made.
bModel 4: Adjusted for age, sex, urbanity, ethnicity, annual household income, education level, smoking status, and alcohol consumption, BMI, hypertension, dyslipidemia, and diabetes.
cPhysical activity: Physical activity was assessed by multiplying the metabolic equivalent (MET) value by weekly activity duration (hours/week). The total physical activity level was divided into two groups by the median: <127 MET·h/week (low) and ≥127 MET·h/week (high).
dWaist circumference: Normal waist circumference: <90 cm for men and <80 cm for women; High waist circumference: ≥90 cm for men or ≥80 cm for women (WHO, 2000).
"-" : HR and 95%CI could not be stably estimated by Cox regression due to zero events in either the reference group or the respective dietary pattern.
