# Supplementary material
Source: Research Square preprint supplement (doi:10.21203/rs.3.rs-8943220/v1)
Supplement: Supplementary file 4 [file 74847660d244d005781e989b.xlsx]

## Sheet: Non-CVD mortality
Table S8 Subgroup analyses of the association between dietary patterns and non-cardiovascular disease mortality risk
Subgroup Variable	Subgroup Category	Subgroup Participant/Death	Dietary Pattery	Dietary Pattery Participant/Death	Model 1 a		Model 4 b		P for interaction
					HR(95%CI)	P value	HR(95%CI)	P value
Age	≤60	21789/100	Rice Pattern	4174/18	1.00(0.00-0.00)		1.00(0.00-0.00)		0.6672
			Balanced Pattern	6215/37	1.21(0.69-2.12)	0.5165	0.96(0.54-1.69)	0.8765
			Meat, Eggs, and Fresh Vegetables Pattern	5041/16	0.72(0.37-1.42)	0.3445	0.79(0.40-1.55)	0.487
			Pickle Pattern	6359/29	1.00(0.56-1.81)	0.9935	0.96(0.53-1.73)	0.894
	>60	24450/322	Rice Pattern	4152/61	1.00(0.00-0.00)		1.00(0.00-0.00)
			Balanced Pattern	7581/107	0.69(0.50-0.94)	0.0185	0.65(0.47-0.89)	0.0078
			Meat, Eggs, and Fresh Vegetables Pattern	5859/58	0.63(0.44-0.90)	0.0112	0.69(0.48-1.00)	0.0487
			Pickle Pattern	6858/96	0.86(0.62-1.18)	0.3445	0.84(0.61-1.16)	0.2819
Sex	Male	18815/255	Rice Pattern	3450/56	1.00(0.00-0.00)		1.00(0.00-0.00)		0.0735
			Balanced Pattern	5613/80	0.71(0.50-0.99)	0.0449	0.57(0.40-0.80)	0.0013
			Meat, Eggs, and Fresh Vegetables Pattern	4312/46	0.65(0.44-0.97)	0.0323	0.67(0.45-0.99)	0.0452
			Pickle Pattern	5440/73	0.77(0.54-1.09)	0.1375	0.72(0.51-1.02)	0.0634
	Female	27424/167	Rice Pattern	4876/23	1.00(0.00-0.00)		1.00(0.00-0.00)
			Balanced Pattern	8183/64	1.28(0.80-2.06)	0.31	1.04(0.64-1.69)	0.877
			Meat, Eggs, and Fresh Vegetables Pattern	6588/28	0.84(0.48-1.46)	0.5353	0.85(0.48-1.48)	0.561
			Pickle Pattern	7777/52	1.30(0.80-2.13)	0.2922	1.25(0.76-2.05)	0.3715
Urbanity	Rural	34517/373	Rice Pattern	5955/70	1.00(0.00-0.00)		1.00(0.00-0.00)		0.1849
			Balanced Pattern	12298/136	0.67(0.50-0.90)	0.0068	0.66(0.49-0.88)	0.0046
			Meat, Eggs, and Fresh Vegetables Pattern	6747/67	0.61(0.44-0.86)	0.0043	0.72(0.52-1.01)	0.06
			Pickle Pattern	9517/100	0.76(0.56-1.03)	0.0791	0.77(0.56-1.04)	0.0893
	Urban	11722/49	Rice Pattern	2371/9	1.00(0.00-0.00)		1.00(0.00-0.00)
			Balanced Pattern	1498/8	1.51(0.58-3.94)	0.3953	1.04(0.39-2.76)	0.9396
			Meat, Eggs, and Fresh Vegetables Pattern	4153/7	0.79(0.29-2.14)	0.6452	0.63(0.23-1.75)	0.3738
			Pickle Pattern	3700/25	1.90(0.89-4.10)	0.0995	1.54(0.71-3.35)	0.2743
Annual household income	≦50000	35959/356	Rice Pattern	6547/66	1.00(0.00-0.00)		1.00(0.00-0.00)		0.6537
			Balanced Pattern	11642/128	0.84(0.63-1.13)	0.2555	0.73(0.54-0.99)	0.0414
			Meat, Eggs, and Fresh Vegetables Pattern	8215/60	0.67(0.47-0.95)	0.0228	0.74(0.52-1.06)	0.0991
			Pickle Pattern	9555/102	0.93(0.68-1.26)	0.6248	0.90(0.66-1.23)	0.522
	>50000	10280/66	Rice Pattern	1779/13	1.00(0.00-0.00)		1.00(0.00-0.00)
			Balanced Pattern	2154/16	0.89(0.43-1.85)	0.7515	0.62(0.29-1.33)	0.2225
			Meat, Eggs, and Fresh Vegetables Pattern	2685/14	0.80(0.38-1.70)	0.5601	0.57(0.26-1.26)	0.1666
			Pickle Pattern	3662/23	0.96(0.49-1.90)	0.9051	0.73(0.37-1.47)	0.3808
Education level	Below high school	39468/390	Rice Pattern	6779/68	1.00(0.00-0.00)		1.00(0.00-0.00)		0.2785
			Balanced Pattern	12564/141	0.86(0.64-1.14)	0.2897	0.77(0.57-1.03)	0.0801
			Meat, Eggs, and Fresh Vegetables Pattern	9143/67	0.68(0.49-0.96)	0.0264	0.75(0.53-1.06)	0.1005
			Pickle Pattern	10982/114	0.95(0.70-1.28)	0.7228	0.93(0.69-1.26)	0.6257
	High school or above	6771/32	Rice Pattern	1547/11	1.00(0.00-0.00)		1.00(0.00-0.00)
			Balanced Pattern	1232/3	0.32(0.09-1.14)	0.0785	0.19(0.05-0.72)	0.014
			Meat, Eggs, and Fresh Vegetables Pattern	1757/7	0.61(0.24-1.58)	0.3126	0.48(0.18-1.26)	0.1369
			Pickle Pattern	2235/11	0.68(0.29-1.56)	0.3569	0.52(0.22-1.22)	0.132
Smoking status	No	35530/265	Rice Pattern	6320/42	1.00(0.00-0.00)		1.00(0.00-0.00)		0.1469
			Balanced Pattern	10381/91	1.04(0.72-1.50)	0.8205	0.84(0.58-1.22)	0.3594
			Meat, Eggs, and Fresh Vegetables Pattern	8510/47	0.80(0.53-1.21)	0.2855	0.81(0.53-1.24)	0.3311
			Pickle Pattern	10319/85	1.15(0.79-1.66)	0.463	1.10(0.76-1.59)	0.6334
	Yes	10709/157	Rice Pattern	2006/37	1.00(0.00-0.00)		1.00(0.00-0.00)
			Balanced Pattern	3415/53	0.66(0.44-1.01)	0.0562	0.56(0.37-0.86)	0.0082
			Meat, Eggs, and Fresh Vegetables Pattern	2390/27	0.59(0.36-0.97)	0.0385	0.61(0.37-1.01)	0.0526
			Pickle Pattern	2898/40	0.69(0.44-1.08)	0.106	0.63(0.40-0.98)	0.0419
Alcohol consumption	No	41592/366	Rice Pattern	7478/71	1.00(0.00-0.00)		1.00(0.00-0.00)		0.2835
			Balanced Pattern	12195/127	0.86(0.64-1.15)	0.3127	0.72(0.54-0.97)	0.0297
			Meat, Eggs, and Fresh Vegetables Pattern	10007/64	0.65(0.46-0.91)	0.0112	0.68(0.48-0.95)	0.0245
			Pickle Pattern	11912/104	0.85(0.63-1.14)	0.2739	0.80(0.59-1.09)	0.1554
	Yes	4647/56	Rice Pattern	848/8	1.00(0.00-0.00)		1.00(0.00-0.00)
			Balanced Pattern	1601/17	0.94(0.40-2.17)	0.8791	0.66(0.28-1.54)	0.337
			Meat, Eggs, and Fresh Vegetables Pattern	893/10	1.15(0.45-2.92)	0.7667	1.08(0.42-2.76)	0.8689
			Pickle Pattern	1305/21	1.71(0.76-3.87)	0.1953	1.49(0.66-3.37)	0.3413
Hypertension	No	10387/53	Rice Pattern	1983/14	1.00(0.00-0.00)		1.00(0.00-0.00)		0.1859
			Balanced Pattern	2754/17	0.81(0.40-1.64)	0.556	0.47(0.23-0.98)	0.045
			Meat, Eggs, and Fresh Vegetables Pattern	2541/8	0.46(0.19-1.10)	0.0802	0.34(0.13-0.85)	0.0209
			Pickle Pattern	3109/14	0.67(0.32-1.40)	0.2877	0.47(0.22-0.99)	0.0468
	Yes	35852/369	Rice Pattern	6343/65	1.00(0.00-0.00)		1.00(0.00-0.00)
			Balanced Pattern	11042/127	0.85(0.63-1.14)	0.2806	0.75(0.56-1.02)	0.0673
			Meat, Eggs, and Fresh Vegetables Pattern	8359/66	0.72(0.51-1.02)	0.0652	0.80(0.56-1.12)	0.1958
			Pickle Pattern	10108/111	0.95(0.70-1.29)	0.7531	0.95(0.70-1.29)	0.7322
Dyslipidemia	No	32353/308	Rice Pattern	5451/51	1.00(0.00-0.00)		1.00(0.00-0.00)		0.4134
			Balanced Pattern	10030/108	0.92(0.66-1.28)	0.6216	0.78(0.55-1.09)	0.1433
			Meat, Eggs, and Fresh Vegetables Pattern	7574/53	0.68(0.46-0.99)	0.0462	0.72(0.49-1.07)	0.1025
			Pickle Pattern	9298/96	1.03(0.74-1.45)	0.8489	1.01(0.72-1.42)	0.9698
	Yes	13886/114	Rice Pattern	2875/28	1.00(0.00-0.00)		1.00(0.00-0.00)
			Balanced Pattern	3766/36	0.75(0.45-1.22)	0.2429	0.59(0.36-0.97)	0.038
			Meat, Eggs, and Fresh Vegetables Pattern	3326/21	0.72(0.41-1.26)	0.2486	0.74(0.42-1.31)	0.3041
			Pickle Pattern	3919/29	0.68(0.41-1.15)	0.149	0.60(0.35-1.01)	0.0546
Diabetes	No	36158/290	Rice Pattern	6468/55	1.00(0.00-0.00)		1.00(0.00-0.00)		0.6662
			Balanced Pattern	10846/96	0.84(0.60-1.17)	0.2951	0.66(0.47-0.93)	0.0157
			Meat, Eggs, and Fresh Vegetables Pattern	8369/50	0.67(0.46-0.98)	0.0389	0.68(0.46-1.00)	0.0477
			Pickle Pattern	10475/89	0.93(0.66-1.30)	0.6531	0.86(0.61-1.20)	0.3734
	Yes	10070/132	Rice Pattern	1857/24	1.00(0.00-0.00)		1.00(0.00-0.00)
			Balanced Pattern	2940/48	0.94(0.57-1.53)	0.794	0.83(0.50-1.37)	0.4597
			Meat, Eggs, and Fresh Vegetables Pattern	2531/24	0.73(0.42-1.29)	0.2767	0.81(0.46-1.44)	0.4761
			Pickle Pattern	2742/36	0.94(0.56-1.57)	0.8052	0.90(0.54-1.51)	0.6942
Physical activity c	Low	23050/231	Rice Pattern	4595/44	1.00(0.00-0.00)		1.00(0.00-0.00)		0.5124
			Balanced Pattern	6080/68	0.91(0.62-1.33)	0.6167	0.70(0.48-1.03)	0.0723
			Meat, Eggs, and Fresh Vegetables Pattern	5803/44	0.76(0.50-1.16)	0.2061	0.81(0.53-1.23)	0.3252
			Pickle Pattern	6572/75	1.06(0.73-1.54)	0.7564	0.94(0.64-1.36)	0.7316
	High	23189/191	Rice Pattern	3731/35	1.00(0.00-0.00)		1.00(0.00-0.00)
			Balanced Pattern	7716/76	0.86(0.58-1.28)	0.453	0.72(0.48-1.08)	0.1147
			Meat, Eggs, and Fresh Vegetables Pattern	5097/30	0.60(0.37-0.98)	0.042	0.62(0.38-1.02)	0.0597
			Pickle Pattern	6645/50	0.78(0.51-1.20)	0.2585	0.79(0.51-1.21)	0.2727
Waist circumference d	Normal	21490/250	Rice Pattern	3898/48	1.00(0.00-0.00)		1.00(0.00-0.00)		0.4424
			Balanced Pattern	6517/82	0.82(0.58-1.17)	0.2768	0.65(0.45-0.93)	0.0178
			Meat, Eggs, and Fresh Vegetables Pattern	4870/49	0.80(0.54-1.19)	0.2613	0.80(0.53-1.19)	0.2708
			Pickle Pattern	6205/71	0.86(0.60-1.24)	0.4217	0.81(0.56-1.17)	0.2585
	High	24728/172	Rice Pattern	4426/31	1.00(0.00-0.00)		1.00(0.00-0.00)
			Balanced Pattern	7267/62	0.94(0.61-1.45)	0.791	0.80(0.52-1.24)	0.3257
			Meat, Eggs, and Fresh Vegetables Pattern	6027/25	0.56(0.33-0.95)	0.0303	0.61(0.36-1.03)	0.0662
			Pickle Pattern	7008/54	1.02(0.65-1.58)	0.9477	0.98(0.63-1.53)	0.9304
BMI	<28	38630/689	Rice Pattern	6980/69	1.00(0.00-0.00)		1.00(0.00-0.00)		0.5517
			Balanced Pattern	11331/127	0.89(0.67-1.20)	0.4535	0.73(0.54-0.98)	0.0342
			Meat, Eggs, and Fresh Vegetables Pattern	9198/70	0.75(0.54-1.04)	0.0847	0.78(0.56-1.09)	0.1448
			Pickle Pattern	11121/112	0.95(0.70-1.28)	0.7154	0.90(0.67-1.22)	0.5072
	≥28	7609/44	Rice Pattern	1346/10	1.00(0.00-0.00)		1.00(0.00-0.00)
			Balanced Pattern	2465/17	0.74(0.34-1.61)	0.4455	0.61(0.27-1.35)	0.2218
			Meat, Eggs, and Fresh Vegetables Pattern	1702/4	0.28(0.09-0.88)	0.0301	0.30(0.09-0.97)	0.0439
			Pickle Pattern	2096/13	0.75(0.33-1.71)	0.4937	0.69(0.30-1.60)	0.384
aModel 1: No adjustments made.
bModel 4: Adjusted for age, sex, urbanity, ethnicity, annual household income, education level, smoking status, and alcohol consumption, BMI, hypertension, dyslipidemia, and diabetes.
cPhysical activity: Physical activity was assessed by multiplying the metabolic equivalent (MET) value by weekly activity duration (hours/week). The total physical activity level was divided into two groups by the median: <127 MET·h/week (low) and ≥127 MET·h/week (high).
dWaist circumference: Normal waist circumference: <90 cm for men and <80 cm for women; High waist circumference: ≥90 cm for men or ≥80 cm for women (WHO, 2000).
"-" : HR and 95%CI could not be stably estimated by Cox regression due to zero events in either the reference group or the respective dietary pattern.
