# Supplementary material
Source: Research Square preprint supplement (doi:10.21203/rs.3.rs-8943220/v1)
Supplement: Supplementary file 5 [file 8040838615d259c4ca61bea8.xlsx]

## Sheet: Chronic CVD mortality 
Table S7 Subgroup analysis of the association between dietary patterns and chronic cardiovascular disease mortality risk
Subgroup Variable	Subgroup Category	Subgroup Participant/Death	Dietary Pattery	Dietary Pattery Participant/Death	Model 1 a		Model 4 b		P for interaction
					HR(95%CI)	P value	HR(95%CI)	P value
Age	≤60	21789/21	Rice Pattern	4174/1	1.00(0.00-0.00)		1.00(0.00-0.00)		0.0898
			Balanced Pattern	6215/10	5.82(0.75-45.46)	0.0931	4.50(0.57-35.27)	0.1522
			Meat, Eggs, and Fresh Vegetables Pattern	5041/0	-	-	-	-
			Pickle Pattern	6359/10	6.25(0.80-48.79)	0.0807	6.27(0.80-49.03)	0.0803
	>60	24450/146	Rice Pattern	4152/27	1.00(0.00-0.00)		1.00(0.00-0.00)
			Balanced Pattern	7581/61	0.89(0.57-1.40)	0.6199	0.70(0.44-1.12)	0.1349
			Meat, Eggs, and Fresh Vegetables Pattern	5859/23	0.51(0.29-0.89)	0.0182	0.42(0.23-0.75)	0.0034
			Pickle Pattern	6858/35	0.70(0.43-1.16)	0.1717	0.64(0.39-1.06)	0.0841
Sex	Male	18815/106	Rice Pattern	3450/19	1.00(0.00-0.00)		1.00(0.00-0.00)		0.832
			Balanced Pattern	5613/44	1.18(0.69-2.02)	0.5537	0.79(0.45-1.37)	0.3956
			Meat, Eggs, and Fresh Vegetables Pattern	4312/14	0.54(0.27-1.08)	0.0796	0.41(0.20-0.83)	0.0133
			Pickle Pattern	5440/29	0.90(0.50-1.60)	0.7072	0.77(0.43-1.38)	0.3797
	Female	27424/61	Rice Pattern	4876/9	1.00(0.00-0.00)		1.00(0.00-0.00)
			Balanced Pattern	8183/27	1.39(0.66-2.97)	0.3891	0.88(0.40-1.91)	0.7377
			Meat, Eggs, and Fresh Vegetables Pattern	6588/9	0.66(0.26-1.65)	0.3702	0.51(0.19-1.35)	0.1768
			Pickle Pattern	7777/16	1.01(0.44-2.28)	0.9893	0.95(0.42-2.16)	0.9008
Urbanity	Rural	34517/150	Rice Pattern	5955/25	1.00(0.00-0.00)		1.00(0.00-0.00)		0.207
			Balanced Pattern	12298/67	0.80(0.51-1.27)	0.3502	0.70(0.44-1.11)	0.1279
			Meat, Eggs, and Fresh Vegetables Pattern	6747/20	0.39(0.22-0.71)	0.0021	0.36(0.19-0.66)	0.0011
			Pickle Pattern	9517/38	0.68(0.41-1.13)	0.1332	0.69(0.41-1.14)	0.1488
	Urban	11722/17	Rice Pattern	2371/3	1.00(0.00-0.00)		1.00(0.00-0.00)
			Balanced Pattern	1498/4	2.21(0.49-9.89)	0.3015	2.18(0.47-10.03)	0.3168
			Meat, Eggs, and Fresh Vegetables Pattern	4153/3	0.92(0.18-4.59)	0.9185	1.04(0.21-5.22)	0.965
			Pickle Pattern	3700/7	1.60(0.41-6.21)	0.496	1.40(0.36-5.49)	0.6297
Annual household income	≦50000	35959/146	Rice Pattern	6547/24	1.00(0.00-0.00)		1.00(0.00-0.00)		0.3335
			Balanced Pattern	11642/64	1.15(0.72-1.83)	0.571	0.82(0.50-1.32)	0.4074
			Meat, Eggs, and Fresh Vegetables Pattern	8215/17	0.45(0.24-0.84)	0.0125	0.36(0.19-0.70)	0.0023
			Pickle Pattern	9555/41	0.97(0.58-1.60)	0.8971	0.88(0.53-1.47)	0.6285
	>50000	10280/21	Rice Pattern	1779/4	1.00(0.00-0.00)		1.00(0.00-0.00)
			Balanced Pattern	2154/7	1.19(0.35-4.06)	0.7841	0.78(0.21-2.83)	0.7048
			Meat, Eggs, and Fresh Vegetables Pattern	2685/6	1.07(0.30-3.78)	0.9217	0.74(0.20-2.79)	0.6564
			Pickle Pattern	3662/4	0.53(0.13-2.13)	0.3722	0.38(0.09-1.56)	0.1793
Education level	Below high school	39468/161	Rice Pattern	6779/28	1.00(0.00-0.00)		1.00(0.00-0.00)		0.9899
			Balanced Pattern	12564/68	1.00(0.64-1.55)	0.9828	0.76(0.48-1.19)	0.224
			Meat, Eggs, and Fresh Vegetables Pattern	9143/21	0.47(0.27-0.83)	0.0092	0.39(0.21-0.70)	0.0016
			Pickle Pattern	10982/44	0.86(0.53-1.38)	0.5226	0.79(0.49-1.28)	0.3431
	High school or above	6771/6	Rice Pattern	1547/0	1.00(0.00-0.00)		1.00(0.00-0.00)
			Balanced Pattern	1232/3	-	-	-	-
			Meat, Eggs, and Fresh Vegetables Pattern	1757/2	-	-	-	-
			Pickle Pattern	2235/1	-	-	-	-
Smoking status	No	35530/117	Rice Pattern	6320/20	1.00(0.00-0.00)		1.00(0.00-0.00)		0.7886
			Balanced Pattern	10381/52	1.27(0.76-2.12)	0.3696	0.88(0.52-1.50)	0.6364
			Meat, Eggs, and Fresh Vegetables Pattern	8510/14	0.46(0.23-0.92)	0.0276	0.38(0.19-0.78)	0.0079
			Pickle Pattern	10319/31	0.87(0.50-1.53)	0.6257	0.80(0.46-1.41)	0.4476
	Yes	10709/50	Rice Pattern	2006/8	1.00(0.00-0.00)		1.00(0.00-0.00)
			Balanced Pattern	3415/19	1.12(0.49-2.55)	0.7969	0.68(0.29-1.58)	0.3705
			Meat, Eggs, and Fresh Vegetables Pattern	2390/9	0.83(0.32-2.16)	0.7036	0.53(0.19-1.45)	0.2158
			Pickle Pattern	2898/14	1.09(0.45-2.59)	0.8549	0.82(0.34-1.98)	0.6501
Alcohol consumption	No	41592/151	Rice Pattern	7478/25	1.00(0.00-0.00)		1.00(0.00-0.00)		0.9245
			Balanced Pattern	12195/63	1.23(0.78-1.96)	0.3761	0.84(0.52-1.36)	0.4814
			Meat, Eggs, and Fresh Vegetables Pattern	10007/21	0.56(0.31-1.00)	0.0481	0.45(0.24-0.82)	0.009
			Pickle Pattern	11912/42	0.95(0.58-1.57)	0.8496	0.86(0.52-1.42)	0.5584
	Yes	4647/16	Rice Pattern	848/3	1.00(0.00-0.00)		1.00(0.00-0.00)
			Balanced Pattern	1601/8	1.26(0.33-4.76)	0.7317	0.67(0.17-2.62)	0.5622
			Meat, Eggs, and Fresh Vegetables Pattern	893/2	0.61(0.10-3.63)	0.5829	0.37(0.06-2.36)	0.2918
			Pickle Pattern	1305/3	0.66(0.13-3.28)	0.612	0.47(0.09-2.40)	0.3654
Hypertension	No	10387/17	Rice Pattern	1983/3	1.00(0.00-0.00)		1.00(0.00-0.00)		0.8004
			Balanced Pattern	2754/9	2.08(0.56-7.68)	0.2739	0.78(0.19-3.19)	0.7277
			Meat, Eggs, and Fresh Vegetables Pattern	2541/1	0.25(0.03-2.44)	0.2343	-	-
			Pickle Pattern	3109/4	0.92(0.21-4.09)	0.9079	0.57(0.12-2.61)	0.4654
	Yes	35852/150	Rice Pattern	6343/25	1.00(0.00-0.00)		1.00(0.00-0.00)
			Balanced Pattern	11042/62	1.09(0.69-1.74)	0.7126	0.81(0.50-1.30)	0.3775
			Meat, Eggs, and Fresh Vegetables Pattern	8359/22	0.58(0.32-1.02)	0.0595	0.50(0.28-0.90)	0.0202
			Pickle Pattern	10108/41	0.89(0.54-1.46)	0.6435	0.83(0.51-1.37)	0.4745
Dyslipidemia	No	32353/126	Rice Pattern	5451/20	1.00(0.00-0.00)		1.00(0.00-0.00)		0.7784
			Balanced Pattern	10030/56	1.23(0.74-2.05)	0.4279	0.83(0.49-1.40)	0.4885
			Meat, Eggs, and Fresh Vegetables Pattern	7574/18	0.53(0.28-1.00)	0.0497	0.40(0.21-0.78)	0.0073
			Pickle Pattern	9298/32	0.86(0.49-1.50)	0.5919	0.78(0.45-1.37)	0.3945
	Yes	13886/41	Rice Pattern	2875/8	1.00(0.00-0.00)		1.00(0.00-0.00)
			Balanced Pattern	3766/15	1.12(0.48-2.66)	0.791	0.81(0.34-1.98)	0.6493
			Meat, Eggs, and Fresh Vegetables Pattern	3326/5	0.58(0.19-1.77)	0.3399	0.58(0.19-1.78)	0.3383
			Pickle Pattern	3919/13	1.08(0.45-2.61)	0.8609	0.95(0.39-2.30)	0.9001
Diabetes	No	36158/108	Rice Pattern	6468/20	1.00(0.00-0.00)		1.00(0.00-0.00)		0.2364
			Balanced Pattern	10846/40	0.97(0.57-1.66)	0.916	0.66(0.38-1.15)	0.1399
			Meat, Eggs, and Fresh Vegetables Pattern	8369/13	0.46(0.23-0.92)	0.028	0.37(0.18-0.77)	0.0075
			Pickle Pattern	10475/35	1.01(0.58-1.75)	0.9815	0.89(0.51-1.55)	0.6783
	Yes	10070/59	Rice Pattern	1857/8	1.00(0.00-0.00)		1.00(0.00-0.00)
			Balanced Pattern	2940/31	1.93(0.88-4.20)	0.0988	1.26(0.56-2.82)	0.5829
			Meat, Eggs, and Fresh Vegetables Pattern	2531/10	0.82(0.32-2.08)	0.6789	0.60(0.23-1.58)	0.3029
			Pickle Pattern	2742/10	0.76(0.30-1.93)	0.5619	0.64(0.25-1.63)	0.3499
Physical activity c	Low	23050/90	Rice Pattern	4595/12	1.00(0.00-0.00)		1.00(0.00-0.00)		0.1378
			Balanced Pattern	6080/36	1.86(0.97-3.58)	0.064	1.13(0.58-2.21)	0.7183
			Meat, Eggs, and Fresh Vegetables Pattern	5803/11	0.67(0.30-1.52)	0.3392	0.54(0.23-1.25)	0.1504
			Pickle Pattern	6572/31	1.64(0.84-3.20)	0.1462	1.35(0.69-2.64)	0.3794
	High	23189/77	Rice Pattern	3731/16	1.00(0.00-0.00)		1.00(0.00-0.00)
			Balanced Pattern	7716/35	0.85(0.47-1.54)	0.6	0.61(0.33-1.14)	0.1213
			Meat, Eggs, and Fresh Vegetables Pattern	5097/12	0.48(0.23-1.02)	0.0562	0.37(0.16-0.81)	0.0138
			Pickle Pattern	6645/14	0.46(0.22-0.94)	0.0322	0.44(0.21-0.90)	0.0252
Waist circumference d	Normal	21490/100	Rice Pattern	3898/15	1.00(0.00-0.00)		1.00(0.00-0.00)		0.7269
			Balanced Pattern	6517/43	1.42(0.79-2.56)	0.2422	0.86(0.47-1.58)	0.6346
			Meat, Eggs, and Fresh Vegetables Pattern	4870/16	0.78(0.38-1.57)	0.4851	0.55(0.26-1.15)	0.1131
			Pickle Pattern	6205/26	1.02(0.54-1.92)	0.9606	0.88(0.47-1.68)	0.7067
	High	24728/67	Rice Pattern	4426/13	1.00(0.00-0.00)		1.00(0.00-0.00)
			Balanced Pattern	7267/28	1.04(0.54-2.02)	0.9052	0.75(0.38-1.48)	0.4064
			Meat, Eggs, and Fresh Vegetables Pattern	6027/7	0.35(0.14-0.88)	0.0262	0.31(0.12-0.78)	0.0135
			Pickle Pattern	7008/19	0.84(0.42-1.71)	0.6353	0.77(0.38-1.56)	0.464
BMI	<28	38630/689	Rice Pattern	6980/25	1.00(0.00-0.00)		1.00(0.00-0.00)		0.4802
			Balanced Pattern	11331/60	1.19(0.74-1.89)	0.4768	0.81(0.50-1.30)	0.3762
			Meat, Eggs, and Fresh Vegetables Pattern	9198/19	0.52(0.29-0.95)	0.0338	0.43(0.23-0.80)	0.0081
			Pickle Pattern	11121/41	0.94(0.57-1.55)	0.8127	0.84(0.51-1.39)	0.4949
	≥28	7609/22	Rice Pattern	1346/3	1.00(0.00-0.00)		1.00(0.00-0.00)
			Balanced Pattern	2465/11	1.68(0.47-6.06)	0.4278	0.96(0.26-3.50)	0.9498
			Meat, Eggs, and Fresh Vegetables Pattern	1702/4	0.86(0.19-3.84)	0.8401	0.50(0.11-2.33)	0.3744
			Pickle Pattern	2096/4	0.77(0.17-3.46)	0.7366	0.54(0.12-2.47)	0.4233
aModel 1: No adjustments made.
bModel 4: Adjusted for age, sex, urbanity, ethnicity, annual household income, education level, smoking status, and alcohol consumption, BMI, hypertension, dyslipidemia, and diabetes.
cPhysical activity: Physical activity was assessed by multiplying the metabolic equivalent (MET) value by weekly activity duration (hours/week). The total physical activity level was divided into two groups by the median: <127 MET·h/week (low) and ≥127 MET·h/week (high).
dWaist circumference: Normal waist circumference: <90 cm for men and <80 cm for women; High waist circumference: ≥90 cm for men or ≥80 cm for women (WHO, 2000).
"-" : HR and 95%CI could not be stably estimated by Cox regression due to zero events in either the reference group or the respective dietary pattern.
