# Supplementary material
Source: Research Square preprint supplement (doi:10.21203/rs.3.rs-8943220/v1)
Supplement: Supplementary file 6 [file a16c8cd333ddf00ae3567a65.xlsx]

## Sheet: Sheet1
Table S12 Sensitivity analyses of the association between dietary patterns and non-cardiovascular disease mortality risk
Variable	Category	Participant/Death	Dietary Pattery	Dietary Pattery Participant/Death	Model 1 a		Model 4 b		P for interaction
					HR(95%CI)	P value	HR(95%CI)	P value
Age	≤60	19945/96	Rice Pattern	3547/18	1.00(0.00-0.00)		1.00(0.00-0.00)		0.7226
			Balanced Pattern	5993/35	1.14(0.64-2.01)	0.6611	0.90(0.51-1.60)	0.7313
			Meat, Eggs, and Fresh Vegetables Pattern	4500/15	0.68(0.34-1.35)	0.2665	0.74(0.37-1.47)	0.3828
			Pickle Pattern	5905/28	0.97(0.54-1.75)	0.9127	0.92(0.51-1.67)	0.7945
	>60	21491/303	Rice Pattern	3031/58	1.00(0.00-0.00)		1.00(0.00-0.00)
			Balanced Pattern	7369/104	0.69(0.50-0.95)	0.0246	0.65(0.47-0.91)	0.0109
			Meat, Eggs, and Fresh Vegetables Pattern	4881/51	0.58(0.40-0.85)	0.0047	0.65(0.44-0.95)	0.0257
			Pickle Pattern	6210/90	0.85(0.61-1.18)	0.3173	0.83(0.60-1.16)	0.2683
Sex	Male	16678/240	Rice Pattern	2689/53	1.00(0.00-0.00)		1.00(0.00-0.00)		0.1147
			Balanced Pattern	5432/78	0.72(0.51-1.02)	0.0655	0.58(0.40-0.82)	0.0024
			Meat, Eggs, and Fresh Vegetables Pattern	3613/40	0.60(0.40-0.91)	0.0153	0.63(0.41-0.95)	0.026
			Pickle Pattern	4944/69	0.77(0.54-1.10)	0.1465	0.72(0.50-1.03)	0.0713
	Female	24758/159	Rice Pattern	3889/23	1.00(0.00-0.00)		1.00(0.00-0.00)
			Balanced Pattern	7930/61	1.21(0.75-1.96)	0.434	0.99(0.61-1.61)	0.9523
			Meat, Eggs, and Fresh Vegetables Pattern	5768/26	0.78(0.45-1.37)	0.3864	0.79(0.44-1.39)	0.4051
			Pickle Pattern	7171/49	1.23(0.75-2.02)	0.4173	1.18(0.72-1.95)	0.5126
Urbanity	Rural	32075/354	Rice Pattern	4770/68	1.00(0.00-0.00)		1.00(0.00-0.00)		0.1206
			Balanced Pattern	11999/131	0.66(0.49-0.88)	0.0048	0.64(0.48-0.87)	0.0035
			Meat, Eggs, and Fresh Vegetables Pattern	6395/61	0.57(0.40-0.80)	0.0013	0.67(0.47-0.95)	0.0258
			Pickle Pattern	8911/94	0.73(0.54-1.00)	0.0498	0.74(0.54-1.01)	0.0598
	Urban	9361/45	Rice Pattern	1808/8	1.00(0.00-0.00)		1.00(0.00-0.00)
			Balanced Pattern	1363/8	1.74(0.65-4.66)	0.2693	1.22(0.45-3.34)	0.6954
			Meat, Eggs, and Fresh Vegetables Pattern	2986/5	0.68(0.22-2.08)	0.4963	0.58(0.19-1.81)	0.3484
			Pickle Pattern	3204/24	2.09(0.94-4.68)	0.0721	1.65(0.73-3.71)	0.2309
Annual household income	≦50000	32422/338	Rice Pattern	5147/64	1.00(0.00-0.00)		1.00(0.00-0.00)		0.7086
			Balanced Pattern	11262/123	0.83(0.61-1.12)	0.2152	0.72(0.53-0.98)	0.0377
			Meat, Eggs, and Fresh Vegetables Pattern	7204/54	0.62(0.43-0.89)	0.0091	0.69(0.48-1.00)	0.0509
			Pickle Pattern	8809/97	0.90(0.66-1.24)	0.533	0.88(0.64-1.21)	0.4476
	>50000	9014/61	Rice Pattern	1431/12	1.00(0.00-0.00)		1.00(0.00-0.00)
			Balanced Pattern	2100/16	0.96(0.45-2.04)	0.9213	0.65(0.30-1.42)	0.2768
			Meat, Eggs, and Fresh Vegetables Pattern	2177/12	0.75(0.34-1.68)	0.4874	0.52(0.23-1.19)	0.1229
			Pickle Pattern	3306/21	0.97(0.48-1.97)	0.9253	0.73(0.36-1.51)	0.3943
Education level	Below high school	35681/369	Rice Pattern	5326/66	1.00(0.00-0.00)		1.00(0.00-0.00)		0.3224
			Balanced Pattern	12181/136	0.84(0.63-1.13)	0.2515	0.76(0.57-1.03)	0.072
			Meat, Eggs, and Fresh Vegetables Pattern	8018/59	0.62(0.44-0.88)	0.0075	0.69(0.48-0.98)	0.039
			Pickle Pattern	10156/108	0.92(0.68-1.26)	0.615	0.91(0.67-1.23)	0.5344
	High school or above	5755/30	Rice Pattern	1252/10	1.00(0.00-0.00)		1.00(0.00-0.00)
			Balanced Pattern	1181/3	0.35(0.10-1.27)	0.1096	0.21(0.06-0.78)	0.0197
			Meat, Eggs, and Fresh Vegetables Pattern	1363/7	0.68(0.26-1.79)	0.4345	0.52(0.19-1.42)	0.202
			Pickle Pattern	1959/10	0.68(0.28-1.62)	0.3802	0.52(0.22-1.27)	0.1537
Smoking status	No	31818/247	Rice Pattern	5007/40	1.00(0.00-0.00)		1.00(0.00-0.00)		0.1653
			Balanced Pattern	10056/87	1.04(0.71-1.51)	0.8536	0.83(0.57-1.22)	0.352
			Meat, Eggs, and Fresh Vegetables Pattern	7304/41	0.73(0.47-1.13)	0.1583	0.74(0.48-1.15)	0.1859
			Pickle Pattern	9451/79	1.12(0.77-1.64)	0.5585	1.07(0.73-1.57)	0.7182
	Yes	9618/152	Rice Pattern	1571/36	1.00(0.00-0.00)		1.00(0.00-0.00)
			Balanced Pattern	3306/52	0.67(0.44-1.02)	0.0624	0.57(0.37-0.87)	0.0101
			Meat, Eggs, and Fresh Vegetables Pattern	2077/25	0.56(0.34-0.94)	0.0281	0.60(0.36-1.00)	0.0479
			Pickle Pattern	2664/39	0.69(0.44-1.09)	0.114	0.62(0.39-0.98)	0.0423
Alcohol consumption	No	37243/347	Rice Pattern	5894/69	1.00(0.00-0.00)		1.00(0.00-0.00)		0.2178
			Balanced Pattern	11806/122	0.84(0.63-1.13)	0.2595	0.71(0.52-0.96)	0.0241
			Meat, Eggs, and Fresh Vegetables Pattern	8616/57	0.59(0.42-0.84)	0.0034	0.62(0.44-0.89)	0.0086
			Pickle Pattern	10927/99	0.83(0.61-1.13)	0.2257	0.79(0.58-1.07)	0.1299
	Yes	4193/52	Rice Pattern	684/7	1.00(0.00-0.00)		1.00(0.00-0.00)
			Balanced Pattern	1556/17	1.07(0.44-2.57)	0.8848	0.74(0.30-1.79)	0.4973
			Meat, Eggs, and Fresh Vegetables Pattern	765/9	1.19(0.44-3.20)	0.7304	1.18(0.44-3.17)	0.749
			Pickle Pattern	1188/19	1.79(0.75-4.26)	0.1888	1.54(0.65-3.68)	0.3298
Hypertension	No	9138/46	Rice Pattern	1631/13	1.00(0.00-0.00)		1.00(0.00-0.00)		0.2021
			Balanced Pattern	2614/13	0.66(0.31-1.43)	0.2924	0.39(0.18-0.88)	0.0223
			Meat, Eggs, and Fresh Vegetables Pattern	2155/8	0.50(0.21-1.21)	0.1236	0.36(0.14-0.93)	0.0356
			Pickle Pattern	2738/12	0.62(0.29-1.37)	0.2399	0.44(0.20-0.98)	0.044
	Yes	32298/353	Rice Pattern	4947/63	1.00(0.00-0.00)		1.00(0.00-0.00)
			Balanced Pattern	10748/126	0.86(0.64-1.17)	0.3366	0.76(0.56-1.04)	0.0857
			Meat, Eggs, and Fresh Vegetables Pattern	7226/58	0.66(0.46-0.94)	0.0212	0.73(0.51-1.04)	0.0849
			Pickle Pattern	9377/106	0.94(0.69-1.28)	0.685	0.94(0.68-1.28)	0.6767
Dyslipidemia	No	29285/290	Rice Pattern	4390/49	1.00(0.00-0.00)		1.00(0.00-0.00)		0.3565
			Balanced Pattern	9715/105	0.92(0.66-1.30)	0.6431	0.78(0.56-1.11)	0.1637
			Meat, Eggs, and Fresh Vegetables Pattern	6654/46	0.61(0.41-0.91)	0.0158	0.66(0.44-0.99)	0.0446
			Pickle Pattern	8526/90	1.01(0.71-1.43)	0.9591	0.98(0.69-1.40)	0.9287
	Yes	12151/109	Rice Pattern	2188/27	1.00(0.00-0.00)		1.00(0.00-0.00)
			Balanced Pattern	3647/34	0.72(0.44-1.2)	0.2084	0.56(0.34-0.94)	0.0277
			Meat, Eggs, and Fresh Vegetables Pattern	2727/20	0.71(0.40-1.27)	0.252	0.73(0.41-1.31)	0.2897
			Pickle Pattern	3589/28	0.68(0.40-1.16)	0.1554	0.60(0.35-1.02)	0.058
Diabetes	No	32655/270	Rice Pattern	5168/52	1.00(0.00-0.00)		1.00(0.00-0.00)		0.6976
			Balanced Pattern	10509/91	0.83(0.59-1.17)	0.2887	0.65(0.46-0.92)	0.016
			Meat, Eggs, and Fresh Vegetables Pattern	7324/44	0.62(0.42-0.93)	0.0204	0.63(0.42-0.95)	0.0274
			Pickle Pattern	9654/83	0.91(0.65-1.29)	0.6056	0.84(0.59-1.19)	0.3339
	Yes	8770/129	Rice Pattern	1409/24	1.00(0.00-0.00)		1.00(0.00-0.00)
			Balanced Pattern	2843/48	0.93(0.57-1.53)	0.785	0.83(0.50-1.37)	0.4654
			Meat, Eggs, and Fresh Vegetables Pattern	2057/22	0.67(0.38-1.20)	0.1768	0.75(0.42-1.34)	0.3336
			Pickle Pattern	2461/35	0.91(0.54-1.53)	0.7295	0.88(0.52-1.49)	0.6381
Physical activity c	Low	20061/216	Rice Pattern	3399/41	1.00(0.00-0.00)		1.00(0.00-0.00)		0.4444
			Balanced Pattern	5830/66	0.94(0.63-1.38)	0.7382	0.73(0.49-1.08)	0.1158
			Meat, Eggs, and Fresh Vegetables Pattern	4815/39	0.73(0.47-1.13)	0.1552	0.77(0.50-1.20)	0.2441
			Pickle Pattern	6017/70	1.06(0.72-1.56)	0.7672	0.94(0.64-1.39)	0.7512
	High	21375/183	Rice Pattern	3179/35	1.00(0.00-0.00)		1.00(0.00-0.00)
			Balanced Pattern	7532/73	0.82(0.55-1.23)	0.3335	0.68(0.45-1.03)	0.0653
			Meat, Eggs, and Fresh Vegetables Pattern	4566/27	0.54(0.33-0.90)	0.0172	0.56(0.34-0.94)	0.0275
			Pickle Pattern	6098/48	0.75(0.49-1.16)	0.1953	0.75(0.49-1.17)	0.2043
Waist circumference d	Normal	19151/235	Rice Pattern	3035/46	1.00(0.00-0.00)		1.00(0.00-0.00)		0.4158
			Balanced Pattern	6298/79	0.82(0.57-1.18)	0.2811	0.64(0.44-0.93)	0.0177
			Meat, Eggs, and Fresh Vegetables Pattern	4160/44	0.75(0.49-1.13)	0.168	0.76(0.50-1.15)	0.1922
			Pickle Pattern	5658/66	0.84(0.57-1.22)	0.3484	0.79(0.54-1.15)	0.2122
	High	22264/164	Rice Pattern	3541/30	1.00(0.00-0.00)		1.00(0.00-0.00)
			Balanced Pattern	7052/60	0.94(0.60-1.45)	0.767	0.80(0.52-1.26)	0.3384
			Meat, Eggs, and Fresh Vegetables Pattern	5218/22	0.51(0.29-0.88)	0.0158	0.56(0.32-0.97)	0.0374
			Pickle Pattern	6453/52	1.01(0.64-1.58)	0.9664	0.98(0.62-1.54)	0.9293
BMI	<28	34480/358	Rice Pattern	5491/67	1.00(0.00-0.00)		1.00(0.00-0.00)		0.6281
			Balanced Pattern	10952/122	0.88(0.65-1.18)	0.3921	0.71(0.52-0.96)	0.0265
			Meat, Eggs, and Fresh Vegetables Pattern	7874/63	0.69(0.49-0.98)	0.037	0.73(0.51-1.03)	0.0737
			Pickle Pattern	10163/106	0.92(0.68-1.25)	0.6058	0.88(0.65-1.20)	0.4238
	≥28	6956/41	Rice Pattern	1087/9	1.00(0.00-0.00)		1.00(0.00-0.00)
			Balanced Pattern	2410/17	0.81(0.36-1.81)	0.6039	0.68(0.30-1.56)	0.3631
			Meat, Eggs, and Fresh Vegetables Pattern	1507/3	0.23(0.06-0.84)	0.0268	0.25(0.07-0.95)	0.0414
			Pickle Pattern	1952/12	0.76(0.32-1.81)	0.5403	0.69(0.29-1.69)	0.4198
aModel 1: No adjustments made.
bModel 4: Adjusted for age, sex, urbanity, ethnicity, annual household income, education level, smoking status, and alcohol consumption, BMI, hypertension, dyslipidemia, and diabetes.
cPhysical activity: Physical activity was assessed by multiplying the metabolic equivalent (MET) value by weekly activity duration (hours/week). The total physical activity level was divided into two groups by the median: <127 MET·h/week (low) and ≥127 MET·h/week (high).
dWaist circumference: Normal waist circumference: <90 cm for men and <80 cm for women; High waist circumference: ≥90 cm for men or ≥80 cm for women (WHO, 2000).
"-" : HR and 95%CI could not be stably estimated by Cox regression due to zero events in either the reference group or the respective dietary pattern.
