# Supplementary material
Source: Research Square preprint supplement (doi:10.21203/rs.3.rs-8943220/v1)
Supplement: Supplementary file 7 [file b1cb2d4ea4751189f29765b4.xlsx]

## Sheet: Sheet1
Table S11 Sensitivity analyses of the association between dietary patterns and chronic cardiovascular disease mortality risk
Variable	Category	Participant/Death	Dietary Pattery	Dietary Pattery Participant/Death	Model 1 a		Model 4 b		P for interaction
					HR(95%CI)	P value	HR(95%CI)	P value
Age	≤60	19945/19	Rice Pattern	3547/1	1.00(0.00-0.00)		1.00(0.00-0.00)		0.147
			Balanced Pattern	5993/8	4.62(0.58-36.91)	0.1493	3.38(0.42-27.08)	0.2508
			Meat, Eggs, and Fresh Vegetables Pattern	4500/0	-	0.997	-	0.998
			Pickle Pattern	5905/10	6.25(0.8-48.83)	0.0806	6.07(0.78-47.49)	0.0858
	>60	21491/138	Rice Pattern	3031/26	1.00(0.00-0.00)		1.00(0.00-0.00)
			Balanced Pattern	7369/61	0.92(0.58-1.46)	0.7168	0.70(0.44-1.13)	0.1421
			Meat, Eggs, and Fresh Vegetables Pattern	4881/22	0.51(0.29-0.89)	0.019	0.40(0.22-0.73)	0.0027
			Pickle Pattern	6210/29	0.61(0.36-1.03)	0.0655	0.55(0.32-0.93)	0.0267
Sex	Male	16678/98	Rice Pattern	2689/18	1.00(0.00-0.00)		1.00(0.00-0.00)		0.763
			Balanced Pattern	5432/42	1.18(0.68-2.05)	0.5582	0.75(0.42-1.31)	0.3081
			Meat, Eggs, and Fresh Vegetables Pattern	3613/14	0.57(0.28-1.14)	0.1133	0.41(0.20-0.84)	0.0149
			Pickle Pattern	4944/24	0.78(0.43-1.45)	0.4348	0.66(0.36-1.22)	0.1812
	Female	24758/59	Rice Pattern	3889/9	1.00(0.00-0.00)		1.00(0.00-0.00)
			Balanced Pattern	7930/27	1.39(0.65-2.96)	0.3945	0.88(0.40-1.91)	0.7377
			Meat, Eggs, and Fresh Vegetables Pattern	5768/8	0.58(0.22-1.51)	0.2652	0.45(0.16-1.23)	0.1177
			Pickle Pattern	7171/15	0.94(0.41-2.16)	0.8895	0.90(0.39-2.06)	0.796
Urbanity	Rural	32075/143	Rice Pattern	4770/25	1.00(0.00-0.00)		1.00(0.00-0.00)		0.1173
			Balanced Pattern	11999/66	0.77(0.49-1.23)	0.277	0.67(0.42-1.07)	0.0917
			Meat, Eggs, and Fresh Vegetables Pattern	6395/19	0.36(0.20-0.66)	0.001	0.33(0.17-0.62)	0.0005
			Pickle Pattern	8911/33	0.58(0.34-0.98)	0.0408	0.59(0.35-1.00)	0.0505
	Urban	9361/14	Rice Pattern	1808/2	1.00(0.00-0.00)		1.00(0.00-0.00)
			Balanced Pattern	1363/3	2.57(0.43-15.44)	0.3021	2.77(0.45-17.20)	0.2738
			Meat, Eggs, and Fresh Vegetables Pattern	2986/3	1.56(0.26-9.37)	0.6252	1.86(0.31-11.29)	0.5002
			Pickle Pattern	3204/6	2.12(0.43-10.56)	0.3573	1.82(0.36-9.14)	0.4674
Annual household income	≦50000	32422/139	Rice Pattern	5147/23	1.00(0.00-0.00)		1.00(0.00-0.00)		0.4887
			Balanced Pattern	11262/62	1.15(0.71-1.86)	0.5667	0.78(0.48-1.28)	0.3277
			Meat, Eggs, and Fresh Vegetables Pattern	7204/17	0.47(0.25-0.88)	0.0182	0.36(0.19-0.70)	0.0026
			Pickle Pattern	8809/37	0.91(0.54-1.53)	0.7159	0.81(0.48-1.37)	0.4361
	>50000	9014/18	Rice Pattern	1431/4	1.00(0.00-0.00)		1.00(0.00-0.00)
			Balanced Pattern	2100/7	1.17(0.34-3.99)	0.8032	0.81(0.22-3.04)	0.7544
			Meat, Eggs, and Fresh Vegetables Pattern	2177/5	0.91(0.24-3.38)	0.8835	0.65(0.16-2.69)	0.5552
			Pickle Pattern	3306/2	0.27(0.05-1.49)	0.1345	0.20(0.04-1.15)	0.0716
Education level	Below high school	35681/151	Rice Pattern	5326/27	1.00(0.00-0.00)		1.00(0.00-0.00)		0.9901
			Balanced Pattern	12181/66	0.99(0.63-1.55)	0.9718	0.72(0.46-1.14)	0.1619
			Meat, Eggs, and Fresh Vegetables Pattern	8018/20	0.46(0.26-0.83)	0.0091	0.36(0.20-0.67)	0.0011
			Pickle Pattern	10156/38	0.77(0.47-1.26)	0.2911	0.70(0.43-1.15)	0.158
	High school or above	5755/6	Rice Pattern	1252/0	1.00(0.00-0.00)		1.00(0.00-0.00)
			Balanced Pattern	1181/3	-	0.9983	-	0.9989
			Meat, Eggs, and Fresh Vegetables Pattern	1363/2	-	0.9983	-	0.9989
			Pickle Pattern	1959/1	-	0.9984	-	0.999
Smoking status	No	31818/109	Rice Pattern	5007/19	1.00(0.00-0.00)		1.00(0.00-0.00)		0.7208
			Balanced Pattern	10056/51	1.30(0.77-2.20)	0.3307	0.88(0.51-1.51)	0.6329
			Meat, Eggs, and Fresh Vegetables Pattern	7304/13	0.45(0.22-0.92)	0.0276	0.36(0.17-0.75)	0.0066
			Pickle Pattern	9451/26	0.77(0.43-1.39)	0.384	0.71(0.39-1.28)	0.251
	Yes	9618/48	Rice Pattern	1571/8	1.00(0.00-0.00)		1.00(0.00-0.00)
			Balanced Pattern	3306/18	1.05(0.46-2.42)	0.9083	0.61(0.26-1.42)	0.251
			Meat, Eggs, and Fresh Vegetables Pattern	2077/9	0.83(0.32-2.16)	0.701	0.50(0.18-1.39)	0.1844
			Pickle Pattern	2664/13	1.01(0.42-2.44)	0.9894	0.73(0.30-1.79)	0.4907
Alcohol consumption	No	37243/141	Rice Pattern	5894/24	1.00(0.00-0.00)		1.00(0.00-0.00)		0.9075
			Balanced Pattern	11806/61	1.24(0.77-1.98)	0.3816	0.81(0.50-1.32)	0.392
			Meat, Eggs, and Fresh Vegetables Pattern	8616/20	0.55(0.30-1.00)	0.0492	0.42(0.23-0.79)	0.0067
			Pickle Pattern	10927/36	0.85(0.51-1.43)	0.5422	0.76(0.45-1.28)	0.2964
	Yes	4193/16	Rice Pattern	684/3	1.00(0.00-0.00)		1.00(0.00-0.00)
			Balanced Pattern	1556/8	1.26(0.33-4.76)	0.7317	0.67(0.17-2.62)	0.5622
			Meat, Eggs, and Fresh Vegetables Pattern	765/2	0.61(0.1-3.63)	0.5829	0.37(0.06-2.36)	0.2918
			Pickle Pattern	1188/3	0.66(0.13-3.28)	0.612	0.47(0.09-2.40)	0.3654
Hypertension	No	9138/15	Rice Pattern	1631/3	1.00(0.00-0.00)		1.00(0.00-0.00)		0.8471
			Balanced Pattern	2614/8	1.85(0.49-7.00)	0.3627	0.68(0.16-2.94)	0.6081
			Meat, Eggs, and Fresh Vegetables Pattern	2155/1	0.25(0.03-2.44)	0.2355	-	0.9979
			Pickle Pattern	2738/3	0.70(0.14-3.47)	0.6619	0.44(0.09-2.27)	0.3267
	Yes	32298/142	Rice Pattern	4947/24	1.00(0.00-0.00)		1.00(0.00-0.00)
			Balanced Pattern	10748/61	1.11(0.69-1.78)	0.6638	0.79(0.49-1.28)	0.3355
			Meat, Eggs, and Fresh Vegetables Pattern	7226/21	0.57(0.32-1.03)	0.0609	0.48(0.26-0.87)	0.0161
			Pickle Pattern	9377/36	0.81(0.48-1.36)	0.4295	0.75(0.45-1.26)	0.2787
Dyslipidemia	No	29285/120	Rice Pattern	4390/20	1.00(0.00-0.00)		1.00(0.00-0.00)		0.9695
			Balanced Pattern	9715/54	1.18(0.71-1.98)	0.5268	0.78(0.46-1.32)	0.3463
			Meat, Eggs, and Fresh Vegetables Pattern	6654/17	0.50(0.26-0.95)	0.0336	0.37(0.19-0.72)	0.0038
			Pickle Pattern	8526/29	0.78(0.44-1.38)	0.3885	0.71(0.40-1.25)	0.2319
	Yes	12151/37	Rice Pattern	2188/7	1.00(0.00-0.00)		1.00(0.00-0.00)
			Balanced Pattern	3647/15	1.27(0.52-3.13)	0.6042	0.84(0.33-2.12)	0.7167
			Meat, Eggs, and Fresh Vegetables Pattern	2727/5	0.68(0.21-2.13)	0.5033	0.65(0.20-2.06)	0.4601
			Pickle Pattern	3589/10	0.95(0.36-2.51)	0.9224	0.80(0.30-2.11)	0.6468
Diabetes	No	32655/101	Rice Pattern	5168/19	1.00(0.00-0.00)		1.00(0.00-0.00)		0.2244
			Balanced Pattern	10509/40	1.02(0.59-1.76)	0.9533	0.67(0.38-1.17)	0.1555
			Meat, Eggs, and Fresh Vegetables Pattern	7324/12	0.44(0.22-0.91)	0.0275	0.35(0.16-0.74)	0.0062
			Pickle Pattern	9654/30	0.91(0.51-1.62)	0.7476	0.80(0.45-1.42)	0.4411
	Yes	8770/56	Rice Pattern	1409/8	1.00(0.00-0.00)		1.00(0.00-0.00)
			Balanced Pattern	2843/29	1.80(0.82-3.94)	0.1443	1.12(0.49-2.53)	0.7918
			Meat, Eggs, and Fresh Vegetables Pattern	2057/10	0.82(0.32-2.09)	0.6792	0.58(0.22-1.53)	0.2727
			Pickle Pattern	2461/9	0.68(0.26-1.78)	0.4354	0.57(0.22-1.48)	0.2439
Physical activity c	Low	20061/85	Rice Pattern	3399/11	1.00(0.00-0.00)		1.00(0.00-0.00)		0.1009
			Balanced Pattern	5830/35	1.96(0.99-3.87)	0.0527	1.13(0.57-2.27)	0.7237
			Meat, Eggs, and Fresh Vegetables Pattern	4815/11	0.73(0.32-1.69)	0.4623	0.57(0.24-1.35)	0.2022
			Pickle Pattern	6017/28	1.62(0.80-3.25)	0.179	1.31(0.65-2.64)	0.4526
	High	21375/72	Rice Pattern	3179/16	1.00(0.00-0.00)		1.00(0.00-0.00)
			Balanced Pattern	7532/34	0.82(0.45-1.49)	0.5232	0.57(0.31-1.07)	0.0807
			Meat, Eggs, and Fresh Vegetables Pattern	4566/11	0.44(0.20-0.95)	0.0365	0.32(0.14-0.73)	0.007
			Pickle Pattern	6098/11	0.36(0.17-0.77)	0.009	0.34(0.16-0.74)	0.0063
Waist circumference d	Normal	19151/92	Rice Pattern	3035/14	1.00(0.00-0.00)		1.00(0.00-0.00)		0.713
			Balanced Pattern	6298/41	1.44(0.79-2.65)	0.2358	0.81(0.44-1.52)	0.5166
			Meat, Eggs, and Fresh Vegetables Pattern	4160/16	0.83(0.41-1.71)	0.6188	0.55(0.26-1.17)	0.1192
			Pickle Pattern	5658/21	0.88(0.45-1.74)	0.7178	0.74(0.37-1.46)	0.3802
	High	22264/65	Rice Pattern	3541/13	1.00(0.00-0.00)		1.00(0.00-0.00)
			Balanced Pattern	7052/28	1.04(0.54-2.01)	0.913	0.75(0.38-1.47)	0.3979
			Meat, Eggs, and Fresh Vegetables Pattern	5218/6	0.30(0.11-0.79)	0.0152	0.26(0.10-0.70)	0.0078
			Pickle Pattern	6453/18	0.80(0.39-1.63)	0.5373	0.73(0.36-1.50)	0.3945
BMI	<28	34480/136	Rice Pattern	5491/24	1.00(0.00-0.00)		1.00(0.00-0.00)		0.4748
			Balanced Pattern	10952/58	1.19(0.74-1.91)	0.4842	0.77(0.47-1.26)	0.2957
			Meat, Eggs, and Fresh Vegetables Pattern	7874/18	0.52(0.28-0.95)	0.0343	0.41(0.22-0.77)	0.006
			Pickle Pattern	10163/36	0.86(0.51-1.45)	0.5734	0.75(0.45-1.27)	0.2871
	≥28	6956/21	Rice Pattern	1087/3	1.00(0.00-0.00)		1.00(0.00-0.00)
			Balanced Pattern	2410/11	1.68(0.47-6.06)	0.4285	0.91(0.25-3.33)	0.8875
			Meat, Eggs, and Fresh Vegetables Pattern	1507/4	0.85(0.19-3.82)	0.8351	0.47(0.10-2.24)	0.3454
			Pickle Pattern	1952/3	0.58(0.12-2.89)	0.5064	0.39(0.08-2.00)	0.2563
aModel 1: No adjustments made.
bModel 4: Adjusted for age, sex, urbanity, ethnicity, annual household income, education level, smoking status, and alcohol consumption, BMI, hypertension, dyslipidemia, and diabetes.
cPhysical activity: Physical activity was assessed by multiplying the metabolic equivalent (MET) value by weekly activity duration (hours/week). The total physical activity level was divided into two groups by the median: <127 MET·h/week (low) and ≥127 MET·h/week (high).
dWaist circumference: Normal waist circumference: <90 cm for men and <80 cm for women; High waist circumference: ≥90 cm for men or ≥80 cm for women (WHO, 2000).
"-" : HR and 95%CI could not be stably estimated by Cox regression due to zero events in either the reference group or the respective dietary pattern.
