# Supplementary material
Source: Research Square preprint supplement (doi:10.21203/rs.3.rs-8943220/v1)
Supplement: Supplementary file 9 [file d8c90985201276a79037c30d.xlsx]

## Sheet: Sheet1
Table S10 Sensitivity analyses of the association between dietary patterns and acute cardiovascular disease mortality risk
Variable	Category	Participant/Death	Dietary Pattery	Dietary Pattery Participant/Death	Model 1 a		Model 4 b		P for interaction
					HR(95%CI)	P value	HR(95%CI)	P value
Age	≤60	19945/40	Rice Pattern	3547/5	1.00(0.00-0.00)		1.00(0.00-0.00)		0.5003
			Balanced Pattern	5993/17	2.07(0.76-5.63)	0.1523	1.39(0.50-3.84)	0.5308
			Meat, Eggs, and Fresh Vegetables Pattern	4500/5	0.76(0.22-2.63)	0.6668	0.69(0.20-2.46)	0.5709
			Pickle Pattern	5905/13	1.57(0.56-4.40)	0.3928	1.35(0.48-3.83)	0.5719
	>60	21491/148	Rice Pattern	3031/22	1.00(0.00-0.00)		1.00(0.00-0.00)
			Balanced Pattern	7369/65	1.13(0.70-1.84)	0.6125	1.02(0.62-1.67)	0.9326
			Meat, Eggs, and Fresh Vegetables Pattern	4881/20	0.57(0.31-1.05)	0.0719	0.63(0.34-1.16)	0.1339
			Pickle Pattern	6210/41	1.02(0.61-1.71)	0.9392	1.00(0.60-1.69)	0.9867
Sex	Male	16678/114	Rice Pattern	2689/18	1.00(0.00-0.00)		1.00(0.00-0.00)		0.8185
			Balanced Pattern	5432/50	1.38(0.80-2.36)	0.246	1.02(0.59-1.77)	0.942
			Meat, Eggs, and Fresh Vegetables Pattern	3613/16	0.67(0.34-1.32)	0.2489	0.64(0.32-1.27)	0.1993
			Pickle Pattern	4944/30	0.98(0.55-1.76)	0.949	0.87(0.49-1.57)	0.6487
	Female	24758/74	Rice Pattern	3889/9	1.00(0.00-0.00)		1.00(0.00-0.00)
			Balanced Pattern	7930/32	1.66(0.79-3.49)	0.1779	1.24(0.58-2.64)	0.5867
			Meat, Eggs, and Fresh Vegetables Pattern	5768/9	0.66(0.26-1.67)	0.3856	0.64(0.25-1.63)	0.3469
			Pickle Pattern	7171/24	1.54(0.72-3.31)	0.271	1.46(0.68-3.15)	0.3351
Urbanity	Rural	32075/168	Rice Pattern	4770/24	1.00(0.00-0.00)		1.00(0.00-0.00)		0.4847
			Balanced Pattern	11999/79	1.05(0.67-1.66)	0.8308	0.99(0.62-1.57)	0.9612
			Meat, Eggs, and Fresh Vegetables Pattern	6395/22	0.50(0.28-0.91)	0.0217	0.57(0.31-1.02)	0.0596
			Pickle Pattern	8911/43	0.87(0.53-1.44)	0.5891	0.89(0.54-1.46)	0.6334
	Urban	9361/20	Rice Pattern	1808/3	1.00(0.00-0.00)		1.00(0.00-0.00)
			Balanced Pattern	1363/3	1.91(0.38-9.49)	0.431	1.73(0.34-8.79)	0.5098
			Meat, Eggs, and Fresh Vegetables Pattern	2986/3	1.04(0.21-5.14)	0.9664	1.02(0.21-5.10)	0.9791
			Pickle Pattern	3204/11	2.83(0.79-10.18)	0.1118	2.60(0.72-9.42)	0.1473
Annual household income	≦50000	32422/163	Rice Pattern	5147/25	1.00(0.00-0.00)		1.00(0.00-0.00)		0.256
			Balanced Pattern	11262/76	1.29(0.82-2.02)	0.2735	1.03(0.65-1.63)	0.9023
			Meat, Eggs, and Fresh Vegetables Pattern	7204/20	0.55(0.30-0.98)	0.0438	0.57(0.31-1.03)	0.0628
			Pickle Pattern	8809/42	0.97(0.59-1.60)	0.9167	0.92(0.56-1.52)	0.7526
	>50000	9014/25	Rice Pattern	1431/2	1.00(0.00-0.00)		1.00(0.00-0.00)
			Balanced Pattern	2100/6	2.43(0.49-12.20)	0.2799	1.6(0.31-8.31)	0.5749
			Meat, Eggs, and Fresh Vegetables Pattern	2177/5	1.91(0.37-9.83)	0.4415	1.62(0.30-8.79)	0.579
			Pickle Pattern	3306/12	3.58(0.80-16.11)	0.0967	2.90(0.63-13.31)	0.17
Education level	Below high school	35681/171	Rice Pattern	5326/24	1.00(0.00-0.00)		1.00(0.00-0.00)		0.6402
			Balanced Pattern	12181/79	1.33(0.84-2.10)	0.224	1.11(0.70-1.76)	0.6664
			Meat, Eggs, and Fresh Vegetables Pattern	8018/21	0.58(0.32-1.04)	0.0682	0.61(0.34-1.11)	0.1055
			Pickle Pattern	10156/47	1.09(0.67-1.78)	0.7297	1.06(0.65-1.74)	0.8149
	High school or above	5755/17	Rice Pattern	1252/3	1.00(0.00-0.00)		1.00(0.00-0.00)
			Balanced Pattern	1181/3	1.38(0.27-6.89)	0.6985	0.73(0.14-3.84)	0.7091
			Meat, Eggs, and Fresh Vegetables Pattern	1363/4	1.22(0.27-5.48)	0.7916	0.78(0.16-3.79)	0.758
			Pickle Pattern	1959/7	1.68(0.43-6.50)	0.4549	1.09(0.27-4.37)	0.904
Smoking status	No	31818/123	Rice Pattern	5007/20	1.00(0.00-0.00)		1.00(0.00-0.00)		0.438
			Balanced Pattern	10056/45	1.09(0.64-1.84)	0.7611	0.82(0.48-1.41)	0.4775
			Meat, Eggs, and Fresh Vegetables Pattern	7304/17	0.58(0.30-1.10)	0.0949	0.57(0.30-1.11)	0.0967
			Pickle Pattern	9451/41	1.17(0.68-1.99)	0.5767	1.09(0.64-1.86)	0.7522
	Yes	9618/65	Rice Pattern	1571/7	1.00(0.00-0.00)		1.00(0.00-0.00)
			Balanced Pattern	3306/37	2.43(1.08-5.44)	0.0316	1.77(0.78-4.03)	0.1723
			Meat, Eggs, and Fresh Vegetables Pattern	2077/8	0.88(0.32-2.44)	0.8115	0.81(0.29-2.27)	0.6881
			Pickle Pattern	2664/13	1.15(0.46-2.88)	0.7661	0.98(0.39-2.48)	0.9715
Alcohol consumption	No	37243/164	Rice Pattern	5894/25	1.00(0.00-0.00)		1.00(0.00-0.00)		0.4076
			Balanced Pattern	11806/66	1.27(0.80-2.02)	0.3065	0.97(0.61-1.55)	0.895
			Meat, Eggs, and Fresh Vegetables Pattern	8616/22	0.60(0.34-1.06)	0.0805	0.60(0.34-1.08)	0.0892
			Pickle Pattern	10927/51	1.16(0.72-1.88)	0.5342	1.08(0.67-1.75)	0.7449
	Yes	4193/24	Rice Pattern	684/2	1.00(0.00-0.00)		1.00(0.00-0.00)
			Balanced Pattern	1556/16	3.61(0.83-15.7)	0.0872	2.44(0.55-10.93)	0.2425
			Meat, Eggs, and Fresh Vegetables Pattern	765/3	1.37(0.23-8.17)	0.7334	1.06(0.17-6.54)	0.9533
			Pickle Pattern	1188/3	1.04(0.17-6.26)	0.9621	0.88(0.15-5.30)	0.8847
Hypertension	No	9138/17	Rice Pattern	1631/5	1.00(0.00-0.00)		1.00(0.00-0.00)		0.1951
			Balanced Pattern	2614/6	0.85(0.26-2.80)	0.7917	0.46(0.13-1.62)	0.228
			Meat, Eggs, and Fresh Vegetables Pattern	2155/1	0.16(0.02-1.34)	0.0906	0.12(0.01-1.12)	0.0627
			Pickle Pattern	2738/5	0.69(0.20-2.37)	0.5522	0.49(0.14-1.75)	0.2719
	Yes	32298/171	Rice Pattern	4947/22	1.00(0.00-0.00)		1.00(0.00-0.00)
			Balanced Pattern	10748/76	1.49(0.92-2.39)	0.102	1.23(0.76-1.99)	0.4015
			Meat, Eggs, and Fresh Vegetables Pattern	7226/24	0.74(0.41-1.31)	0.3003	0.75(0.42-1.36)	0.3463
			Pickle Pattern	9377/49	1.23(0.74-2.03)	0.4266	1.19(0.72-1.98)	0.4919
Dyslipidemia	No	29285/131	Rice Pattern	4390/18	1.00(0.00-0.00)		1.00(0.00-0.00)		0.606
			Balanced Pattern	9715/62	1.47(0.87-2.48)	0.1514	1.12(0.66-1.91)	0.6837
			Meat, Eggs, and Fresh Vegetables Pattern	6654/17	0.57(0.29-1.10)	0.094	0.57(0.29-1.11)	0.0964
			Pickle Pattern	8526/34	1.02(0.58-1.81)	0.947	0.98(0.55-1.73)	0.9379
	Yes	12151/57	Rice Pattern	2188/9	1.00(0.00-0.00)		1.00(0.00-0.00)
			Balanced Pattern	3647/20	1.33(0.60-2.93)	0.4813	0.96(0.42-2.16)	0.9163
			Meat, Eggs, and Fresh Vegetables Pattern	2727/8	0.84(0.32-2.16)	0.7098	0.82(0.31-2.14)	0.6809
			Pickle Pattern	3589/20	1.49(0.68-3.28)	0.3194	1.27(0.58-2.82)	0.5495
Diabetes	No	32655/132	Rice Pattern	5168/20	1.00(0.00-0.00)		1.00(0.00-0.00)		0.4333
			Balanced Pattern	10509/63	1.52(0.92-2.51)	0.1059	1.14(0.68-1.91)	0.6107
			Meat, Eggs, and Fresh Vegetables Pattern	7324/16	0.56(0.29-1.08)	0.0826	0.54(0.28-1.06)	0.0736
			Pickle Pattern	9654/33	0.94(0.54-1.64)	0.822	0.86(0.49-1.50)	0.5957
	Yes	8770/56	Rice Pattern	1409/7	1.00(0.00-0.00)		1.00(0.00-0.00)
			Balanced Pattern	2843/19	1.28(0.54-3.05)	0.5753	0.91(0.37-2.22)	0.8327
			Meat, Eggs, and Fresh Vegetables Pattern	2057/9	0.90(0.34-2.43)	0.8395	0.90(0.33-2.45)	0.8317
			Pickle Pattern	2461/21	1.89(0.80-4.44)	0.146	1.68(0.71-3.96)	0.2379
Physical activity c	Low	20061/109	Rice Pattern	3399/17	1.00(0.00-0.00)		1.00(0.00-0.00)		0.6734
			Balanced Pattern	5830/41	1.44(0.82-2.54)	0.2079	1.01(0.56-1.80)	0.9875
			Meat, Eggs, and Fresh Vegetables Pattern	4815/17	0.73(0.37-1.43)	0.3631	0.70(0.36-1.39)	0.3139
			Pickle Pattern	6017/34	1.25(0.70-2.24)	0.45	1.09(0.61-1.96)	0.7639
	High	21375/79	Rice Pattern	3179/10	1.00(0.00-0.00)		1.00(0.00-0.00)
			Balanced Pattern	7532/41	1.59(0.79-3.17)	0.192	1.24(0.61-2.51)	0.5501
			Meat, Eggs, and Fresh Vegetables Pattern	4566/8	0.53(0.21-1.35)	0.1859	0.52(0.20-1.33)	0.1723
			Pickle Pattern	6098/20	1.07(0.50-2.29)	0.8569	1.02(0.48-2.19)	0.9569
Waist circumference d	Normal	19151/105	Rice Pattern	3035/14	1.00(0.00-0.00)		1.00(0.00-0.00)		0.8015
			Balanced Pattern	6298/45	1.55(0.85-2.82)	0.1545	1.08(0.59-1.99)	0.8049
			Meat, Eggs, and Fresh Vegetables Pattern	4160/16	0.86(0.42-1.76)	0.6728	0.80(0.38-1.65)	0.5406
			Pickle Pattern	5658/30	1.25(0.66-2.36)	0.4911	1.12(0.59-2.11)	0.738
	High	22264/83	Rice Pattern	3541/13	1.00(0.00-0.00)		1.00(0.00-0.00)
			Balanced Pattern	7052/37	1.37(0.73-2.58)	0.334	1.08(0.56-2.07)	0.816
			Meat, Eggs, and Fresh Vegetables Pattern	5218/9	0.46(0.20-1.08)	0.0728	0.48(0.20-1.13)	0.0915
			Pickle Pattern	6453/24	1.08(0.55-2.11)	0.8327	1.03(0.52-2.02)	0.9402
BMI	<28	34480/155	Rice Pattern	5491/23	1.00(0.00-0.00)		1.00(0.00-0.00)		0.8302
			Balanced Pattern	10952/66	1.39(0.86-2.23)	0.1775	1.03(0.64-1.67)	0.9003
			Meat, Eggs, and Fresh Vegetables Pattern	7874/21	0.65(0.36-1.17)	0.1511	0.63(0.35-1.16)	0.1361
			Pickle Pattern	10163/45	1.14(0.69-1.88)	0.6214	1.05(0.63-1.74)	0.8537
	≥28	6956/33	Rice Pattern	1087/4	1.00(0.00-0.00)		1.00(0.00-0.00)
			Balanced Pattern	2410/16	1.77(0.59-5.31)	0.3082	1.41(0.46-4.40)	0.5493
			Meat, Eggs, and Fresh Vegetables Pattern	1507/4	0.64(0.16-2.56)	0.5262	0.63(0.15-2.61)	0.5189
			Pickle Pattern	1952/9	1.27(0.39-4.12)	0.6929	1.20(0.37-3.93)	0.7613
aModel 1: No adjustments made.
bModel 4: Adjusted for age, sex, urbanity, ethnicity, annual household income, education level, smoking status, and alcohol consumption, BMI, hypertension, dyslipidemia, and diabetes.
cPhysical activity: Physical activity was assessed by multiplying the metabolic equivalent (MET) value by weekly activity duration (hours/week). The total physical activity level was divided into two groups by the median: <127 MET·h/week (low) and ≥127 MET·h/week (high).
dWaist circumference: Normal waist circumference: <90 cm for men and <80 cm for women; High waist circumference: ≥90 cm for men or ≥80 cm for women (WHO, 2000).
"-" : HR and 95%CI could not be stably estimated by Cox regression due to zero events in either the reference group or the respective dietary pattern.
